# Supplementary material for: Short-, Mid-, and Long-Term Efficacy of Deucravacitinib Versus Biologics and Nonbiologics for Plaque Psoriasis: A Network Meta-Analysis
Source: PubMed Central journal article supplement — Dermatol Ther (Heidelb). 2023 Oct 6;13(11):2839–57. doi: 10.1007/s13555-023-01034-7 (PMC10613195; doi:10.1007/s13555-023-01034-7), 2023-10-06
Supplement: 13555_2023_1034_MOESM1_ESM.pdf [file 13555_2023_1034_MOESM1_ESM.pdf]

## **SUPPLEMENTARY MATERIALS**

### **Short-, Mid-, and Long-Term Efficacy of Deucravacitinib Versus Biologics and Nonbiologics for Plaque Psoriasis: A Network Meta-Analysis**

April W. Armstrong, MD, MPH<sup>1</sup>; Richard B. Warren, PhD<sup>2,3</sup>; Yichen Zhong, PhD<sup>4</sup>; Joe Zhuo, PhD<sup>4</sup>; Allie Cichewicz, MSc<sup>5</sup>; Ananth Kadambi, PhD<sup>5</sup>; Daniela Junqueira, PharmD, MSc, PhD<sup>5</sup>; Tracy Westley, MScPH<sup>5</sup>; Renata Kisa, MD<sup>4</sup>; Carolin Daamen, MD, PhD<sup>4</sup>; Matthias Augustin, MD<sup>6</sup>

<sup>1</sup>Keck School of Medicine, University of Southern California, Los Angeles, CA, USA;

<sup>2</sup>Dermatology Centre, Northern Care Alliance NHS Foundation Trust, Manchester, UK; <sup>3</sup>NIHR Manchester Biomedical Research Centre, Manchester University NHS Foundation Trust, Manchester Academic Health Science Centre, Manchester, UK; <sup>4</sup>Bristol Myers Squibb, Princeton, NJ, USA; <sup>5</sup>Evidera, a part of Thermo Fisher Scientific, Waltham, MA, USA; <sup>6</sup>Institute for Health Services Research in Dermatology and Nursing, University Medical Center, Hamburg, Germany

\*Currently: Lumanity, Sheffield, UK

#### **Corresponding Author**

April W. Armstrong, MD, MPH  
Professor and Chief  
Division of Dermatology  
David Geffen Department of Medicine  
University of California Los Angeles  
2001 Santa Monica Boulevard, Suite 1090  
Santa Monica, California 90404  
Ph: 310-917-3376  
Fax: 310-582-6032  
Email: [aprilarmstrong@post.harvard.edu](mailto:aprilarmstrong@post.harvard.edu)

#### **ORCID iDs**

April W. Armstrong: 0000-0003-0064-8707  
Richard B. Warren: 0000-0002-2918-6481  
Allie Cichewicz: 0000-0002-8528-9901  
Ananth Kadambi: 0000-0002-5669-4887  
Daniela Junqueira: 0000-0002-3261-4811  
Matthias Augustin: 0000-0002-4026-8728

**Figure S1. PRISMA flow diagram.**

<sup>a</sup>Pooled analyses of RCTs were not included in the SLR unless unique data were available that were not published elsewhere.

<sup>b</sup>RCTs eligible for global NMA and phase 3 global NRI NMA, including POETYK PSO-1 and POETYK PSO-2.

*NMA* network meta-analysis; *NRI* nonresponder imputation; *PASI* Psoriasis Area and Severity Index; *PRISMA* Preferred Reporting Items for Systematic Reviews and Meta-Analyses; *RCT* randomized controlled trial; *SLR* systematic literature review.

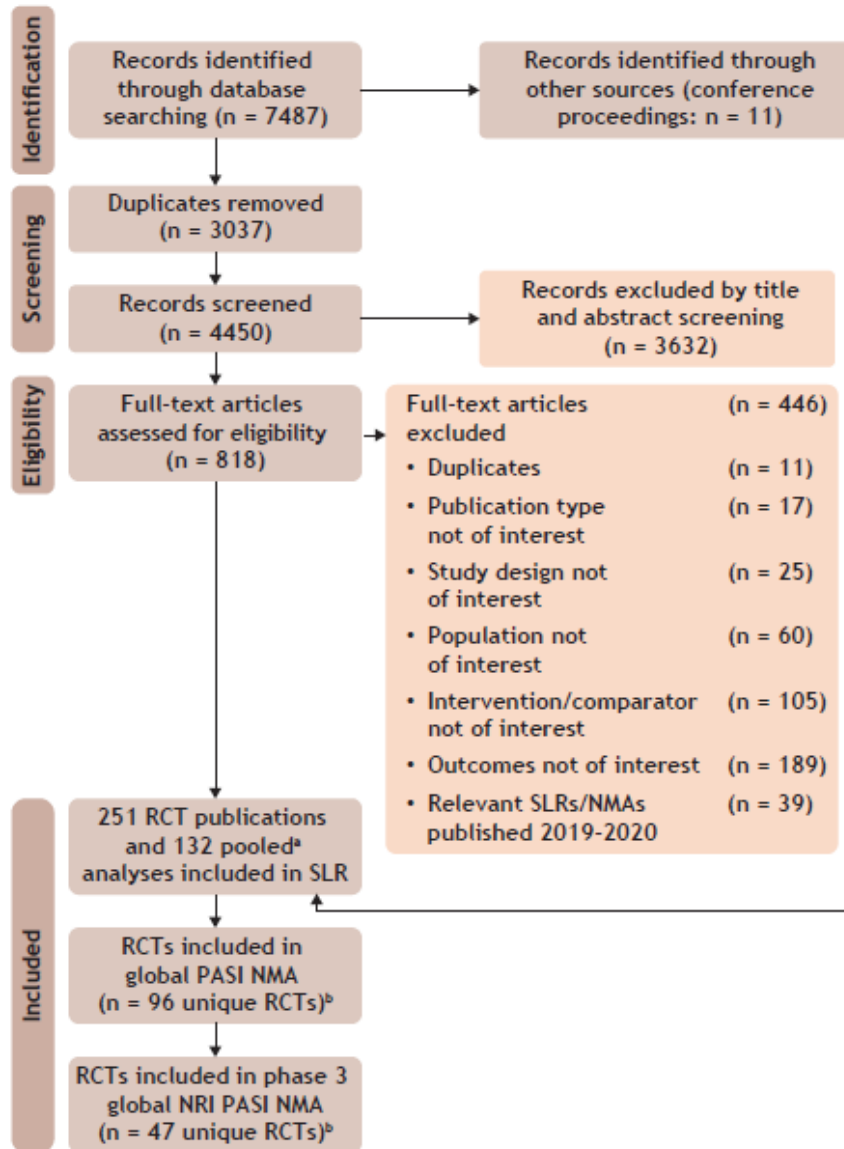

**Figure S2. Estimated odds ratios from the network meta-analysis for short-term (a) PASI 50, (b) PASI 90, and (c) PASI 100.**

*ADM* adalimumab; *APR* apremilast; *BIM* bimekizumab; *BIW* twice weekly; *BRO* brodalumab; *CrI* credible interval; *DEUC* deucravacitinib; *ETC* etanercept; *GUS* guselkumab; *IFX* infliximab; *IL* interleukin; *IXE* ixekizumab; *MTX* methotrexate; *NMA* network meta-analysis; *PASI* Psoriasis Area and Severity Index; *PBO* placebo; *Q2W* every 2 weeks; *Q4W* once every 4 weeks; *Q8W* once every 8 weeks; *RIS* risankizumab; *SEC* secukinumab; *TIL* tildrakizumab; *TNF* tumor necrosis factor; *UST* ustekinumab

(a)

DEUC 6 mg vs:

**Placebo**

PLC

**Nonbiologic**

APR 30 mg

MTX

**TNF-alpha inhibitors**

ETC 25 mg BIW/50 mg QW

ETC 50 mg BIW

ADM 40 mg

IFX 5 mg/kg

**IL-12/IL-23 inhibitors**

UST 45 or 90 mg

UST 90 mg

**IL-17 inhibitors**

SEC 150 mg

SEC 300 mg

BRO 210 mg

IXE 80 mg Q2W

BIM 320 mg

**IL-23 inhibitors**

TIL 100 mg

TIL 200 mg

GUS 100 mg

RIS 150 mg

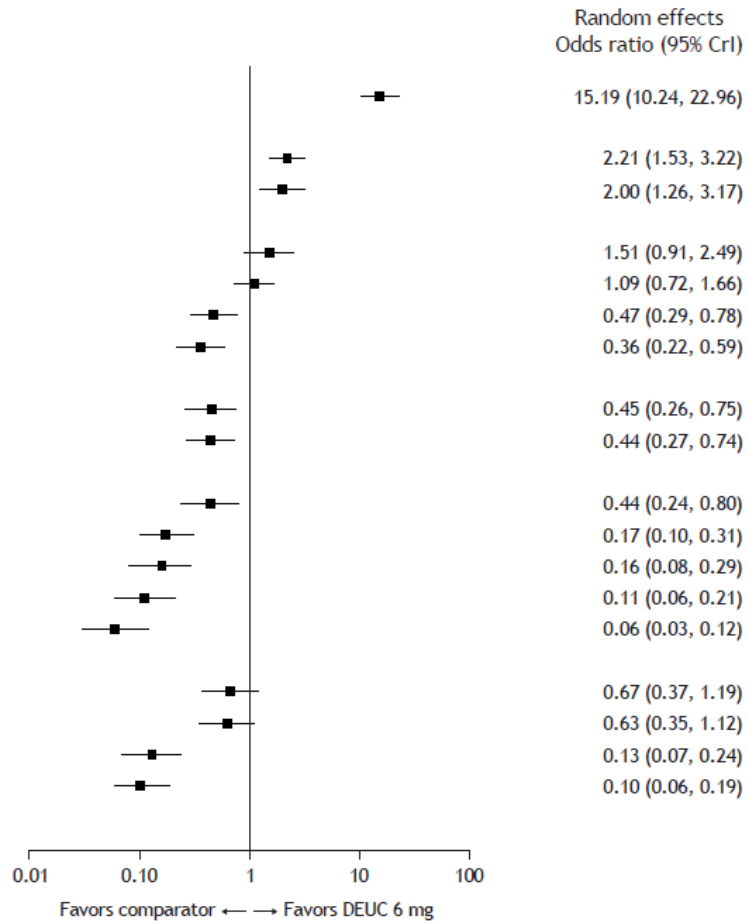

(b)

DEUC 6 mg vs:

**Placebo**

PLC

**Nonbiologic**

APR 30 mg

MTX

**TNF-alpha inhibitors**

ETC 25 mg BIW/50 mg QW

ETC 50 mg BIW

ADM 40 mg

IFX 5 mg/kg

**IL-12/IL-23 inhibitors**

UST 90 mg

UST 45 or 90 mg

**IL-17 inhibitors**

SEC 150 mg

SEC 300 mg

BRO 210 mg

IXE 80 mg Q2W

BIM 320 mg

**IL-23 inhibitors**

TIL 100 mg

TIL 200 mg

GUS 100 mg

RIS 150 mg

Random effects  
Odds ratio (95% CrI)

23.84 (14.96, 38.68)

2.85 (1.98, 4.09)

1.94 (1.22, 3.11)

2.19 (1.30, 3.74)

1.42 (0.97, 2.04)

0.47 (0.32, 0.68)

0.35 (0.23, 0.53)

0.55 (0.35, 0.84)

0.49 (0.33, 0.70)

0.53 (0.34, 0.81)

0.22 (0.15, 0.32)

0.18 (0.12, 0.28)

0.17 (0.11, 0.25)

0.08 (0.05, 0.12)

0.72 (0.46, 1.12)

0.70 (0.45, 1.10)

0.19 (0.12, 0.28)

0.16 (0.11, 0.23)

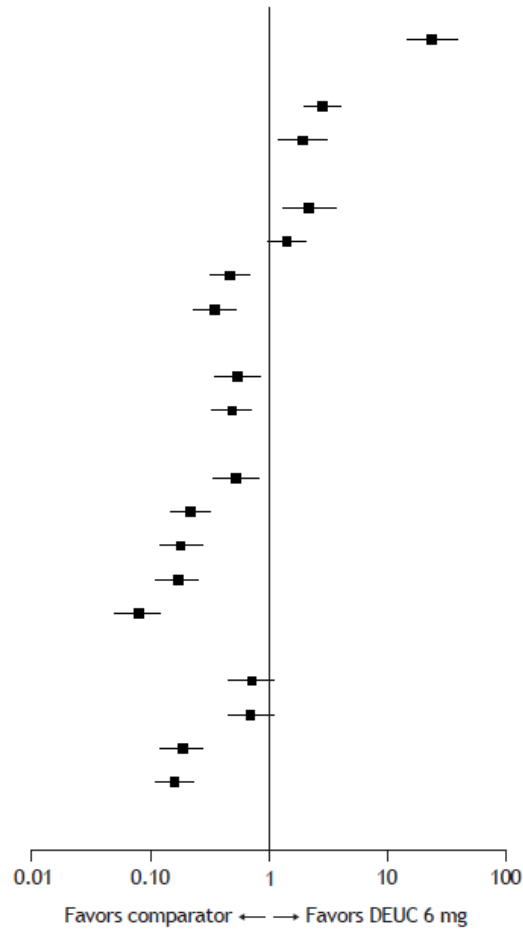

(c)

DEUC 6 mg vs:

**Placebo**

PLC

**Nonbiologic**

APR 30 mg

MTX

**TNF-alpha inhibitors**

ETC 25 mg BIW/50 mg QW

ETC 50 mg BIW

ADM 40 mg

IFX 5 mg/kg

**IL-12/IL-23 inhibitors**

UST 90 mg

UST 45 or 90 mg

**IL-17 inhibitors**

SEC 150 mg

SEC 300 mg

IXE 80 mg Q2W

BRO 210 mg

BIM 320 mg

**IL-23 inhibitors**

TIL 200 mg

TIL 100 mg

GUS 100 mg

RIS 150 mg

Random effects  
Odds ratio (95% CrI)

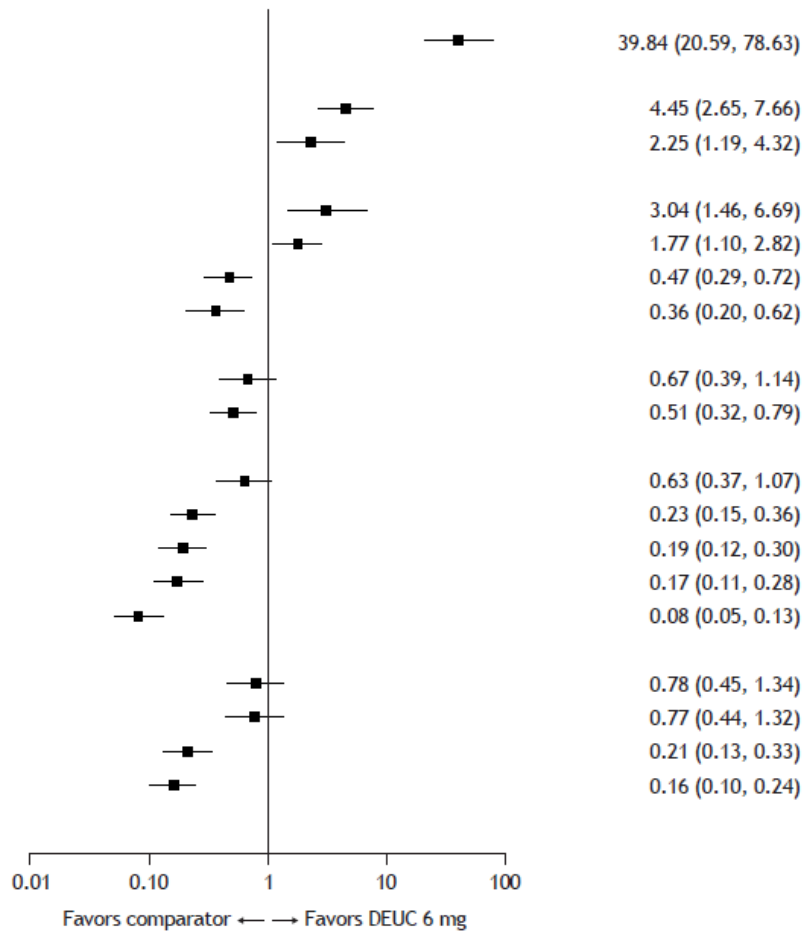

**Figure S3. Estimated odds ratios from the network meta-analysis for mid-term (a) PASI 50, (b) PASI 90, and (c) PASI 100.**

ADM adalimumab; APR apremilast; BIM bimekizumab; BIW twice weekly; BRO brodalumab; CrI credible interval; DEUC deucravacitinib; ETC etanercept; GUS guselkumab; IFX infliximab; IL interleukin; IXE ixekizumab; MTX methotrexate; NMA network meta-analysis; PASI Psoriasis Area and Severity Index; PBO placebo; Q2W every 2 weeks; Q4W once every 4 weeks; Q8W once every 8 weeks; RIS risankizumab; SEC secukinumab; TIL tildrakizumab; TNF tumor necrosis factor; UST ustekinumab

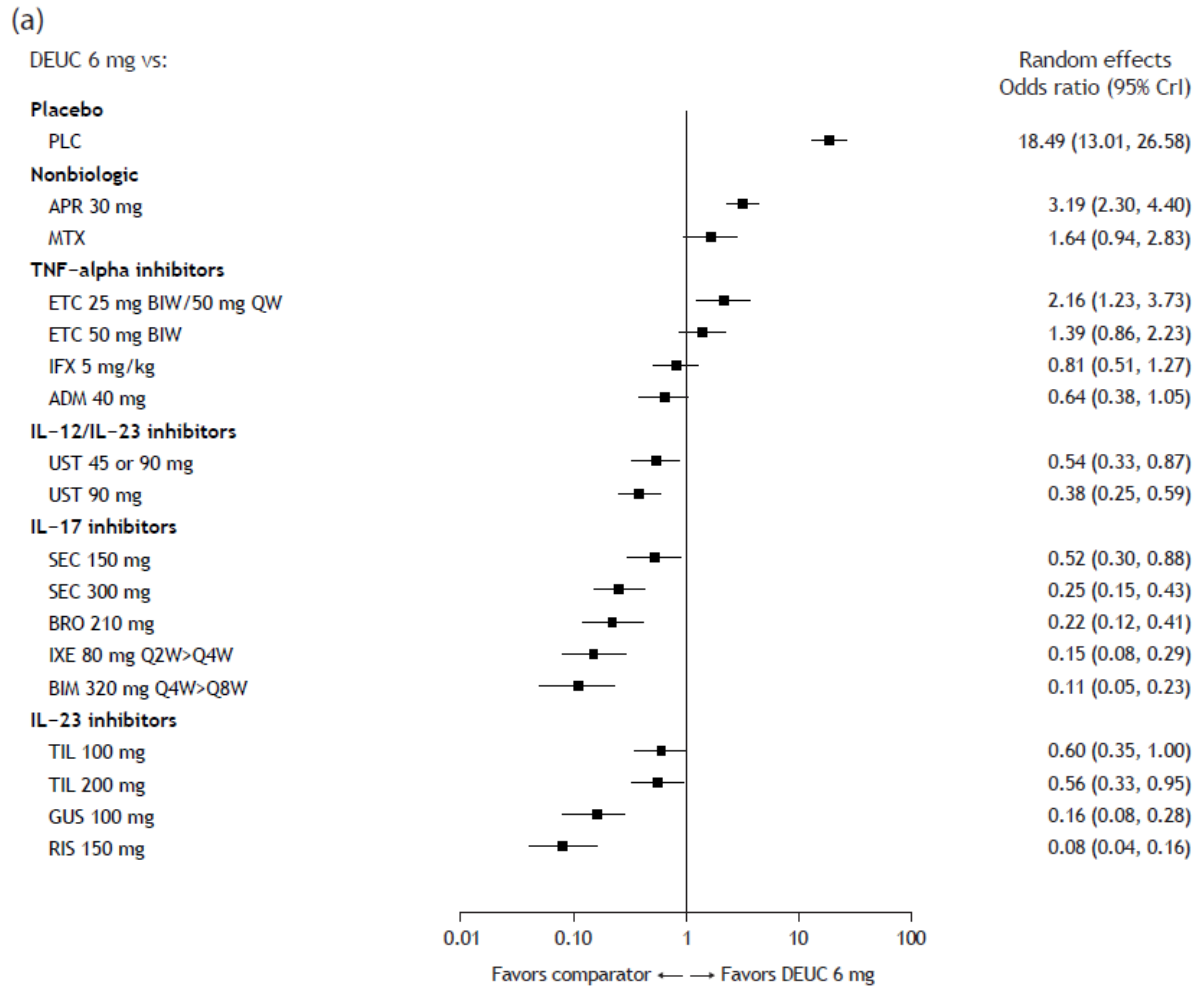

(b)

DEUC 6 mg vs:

**Placebo**

PLC

**Nonbiologic**

APR 30 mg

MTX

**TNF-alpha inhibitors**

ETC 25 mg BIW/50 mg QW

ETC 50 mg BIW

IFX 5 mg/kg

ADM 40 mg

**IL-12/IL-23 inhibitors**

UST 90 mg

UST 45 or 90 mg

**IL-17 inhibitors**

SEC 150 mg

SEC 300 mg

BRO 210 mg

IXE 80 mg Q2W>Q4W

BIM 320 mg Q4W>Q8W

**IL-23 inhibitors**

TIL 100 mg

TIL 200 mg

GUS 100 mg

RIS 150 mg

Random effects  
Odds ratio (95% CrI)

27.96 (17.83, 44.85)

2.65 (1.97, 3.55)

1.59 (0.93, 2.71)

1.86 (1.07, 3.22)

1.31 (0.96, 1.78)

0.58 (0.41, 0.84)

0.53 (0.39, 0.73)

0.55 (0.40, 0.76)

0.44 (0.33, 0.58)

0.54 (0.40, 0.75)

0.26 (0.20, 0.35)

0.20 (0.14, 0.29)

0.16 (0.11, 0.23)

0.11 (0.07, 0.18)

0.60 (0.43, 0.81)

0.50 (0.36, 0.68)

0.19 (0.14, 0.25)

0.13 (0.08, 0.18)

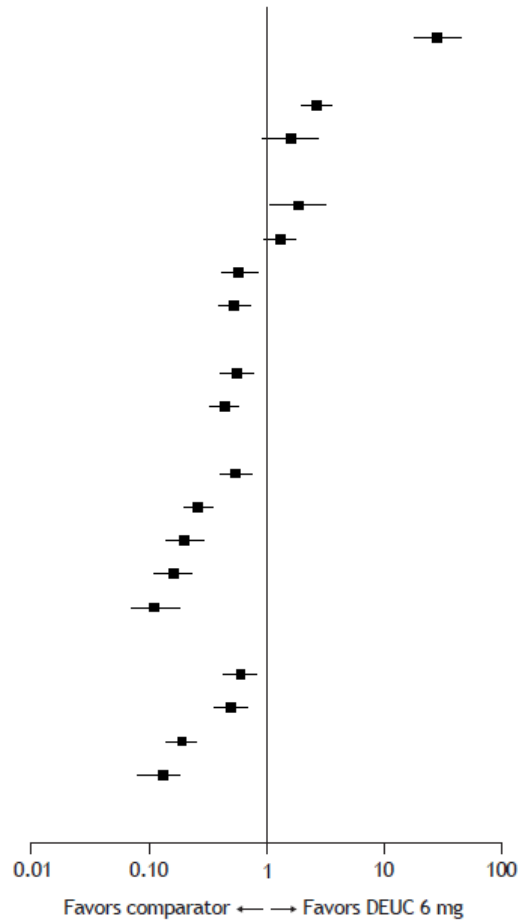

(c)

DEUC 6 mg vs:

**Placebo**

PLC

**Nonbiologic**

APR 30 mg

MTX

**TNF-alpha inhibitors**

ETC 25 mg BIW/50 mg QW

ETC 50 mg BIW

IFX 5 mg/kg

ADM 40 mg

**IL-12/IL-23 inhibitors**

UST 90 mg

UST 45 or 90 mg

**IL-17 inhibitors**

SEC 150 mg

SEC 300 mg

BRO 210 mg

IXE 80 mg Q2W>Q4W

BIM 320 mg Q4W>Q8W

**IL-23 inhibitors**

TIL 100 mg

TIL 200 mg

GUS 100 mg

RIS 150 mg

Random effects  
Odds ratio (95% CrI)

51.73 (27.17, 102.93)

3.06 (2.01, 4.68)

1.77 (0.89, 3.79)

2.14 (1.03, 4.68)

1.55 (1.05, 2.30)

0.57 (0.35, 0.97)

0.51 (0.36, 0.72)

0.48 (0.33, 0.70)

0.42 (0.30, 0.57)

0.61 (0.43, 0.89)

0.27 (0.19, 0.37)

0.17 (0.12, 0.25)

0.15 (0.11, 0.22)

0.11 (0.07, 0.17)

0.64 (0.44, 0.91)

0.48 (0.33, 0.68)

0.22 (0.15, 0.30)

0.15 (0.10, 0.21)

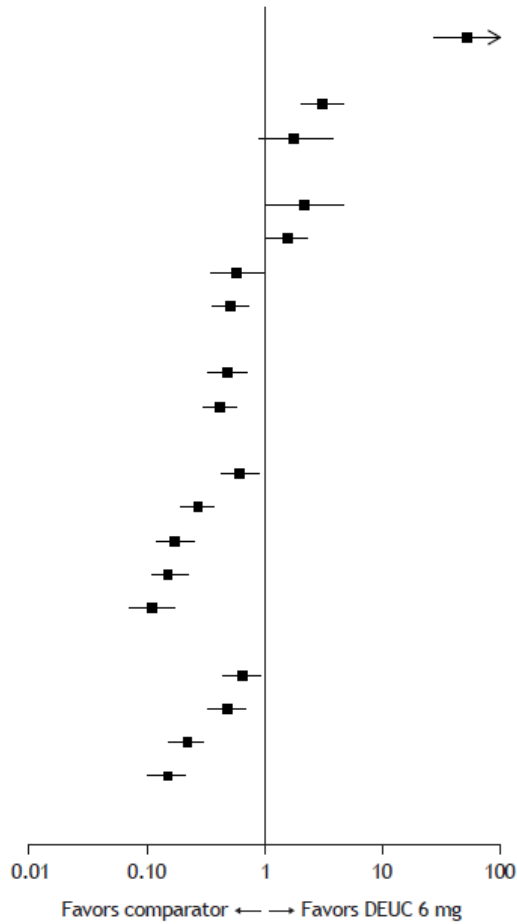



**Figure S4. Estimated odds ratios from the network meta-analysis for long-term (a) PASI 50, (b) PASI 90, and (c) PASI 100.**

ADM adalimumab; APR apremilast; BIM bimekizumab; BIW twice weekly; BRO brodalumab; CrI credible interval; DEUC deucravacitinib; ETC etanercept; GUS guselkumab; IFX infliximab; IL interleukin; IXE ixekizumab; MTX methotrexate; NMA network meta-analysis; PASI Psoriasis Area and Severity Index; PBO placebo; Q2W every 2 weeks; Q4W once every 4 weeks; Q8W once every 8 weeks; RIS risankizumab; SEC secukinumab; TIL tildrakizumab; TNF tumor necrosis factor; UST ustekinumab

(a)

DEUC 6 mg vs:

**Placebo**

PLC

**Nonbiologic**

MTX

APR 30 mg

**TNF-alpha inhibitors**

IFX 5 mg/kg

ETC 50 mg BIW

ADM 40 mg

**IL-12/IL-23 inhibitors**

UST 45 or 90 mg

**IL-17 inhibitors**

SEC 150 mg

SEC 300 mg

BRO 210 mg

IXE 80 mg Q2W>Q4W

BIM 320 mg Q4W>Q8W

**IL-23 inhibitors**

GUS 100 mg

RIS 150 mg

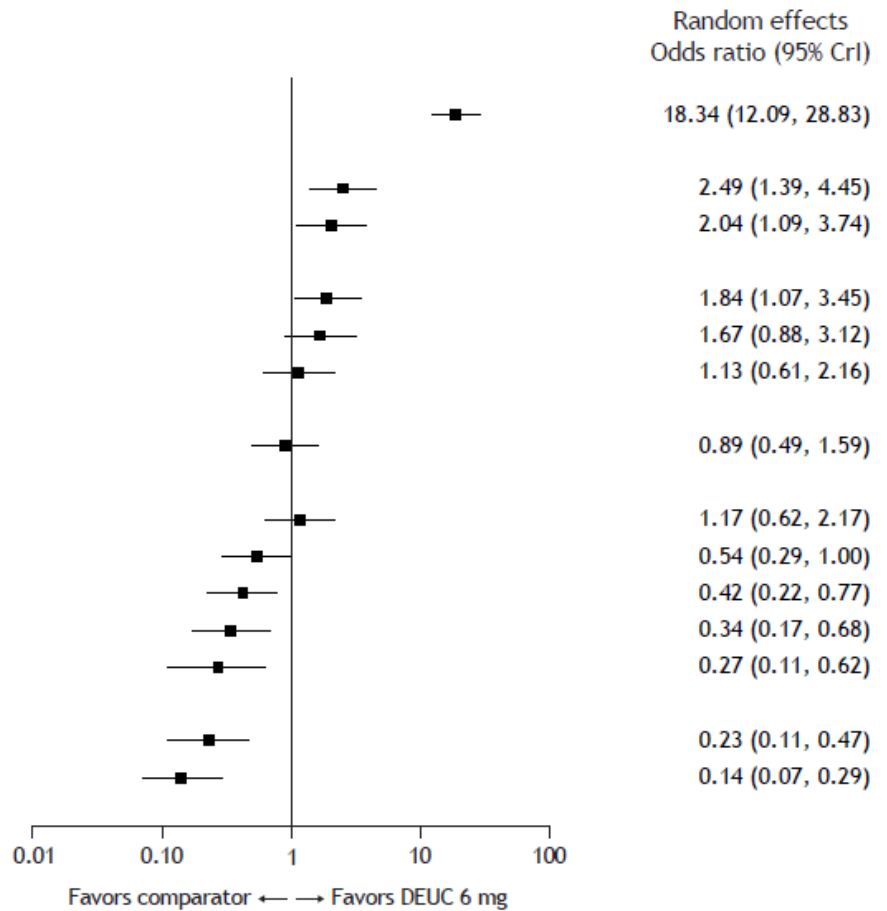

(b)

DEUC 6 mg vs:

**Placebo**

PLC

**Nonbiologic**

MTX

APR 30 mg

**TNF-alpha inhibitors**

ETC 50 mg BIW

IFX 5 mg/kg

ADM 40 mg

**IL-12/IL-23 inhibitors**

UST 45 or 90 mg

**IL-17 inhibitors**

SEC 150 mg

SEC 300 mg

IXE 80 mg Q2W>Q4W

BRO 210 mg

BIM 320 mg Q4W>Q8W

**IL-23 inhibitors**

GUS 100 mg

RIS 150 mg

Random effects  
Odds ratio (95% CrI)

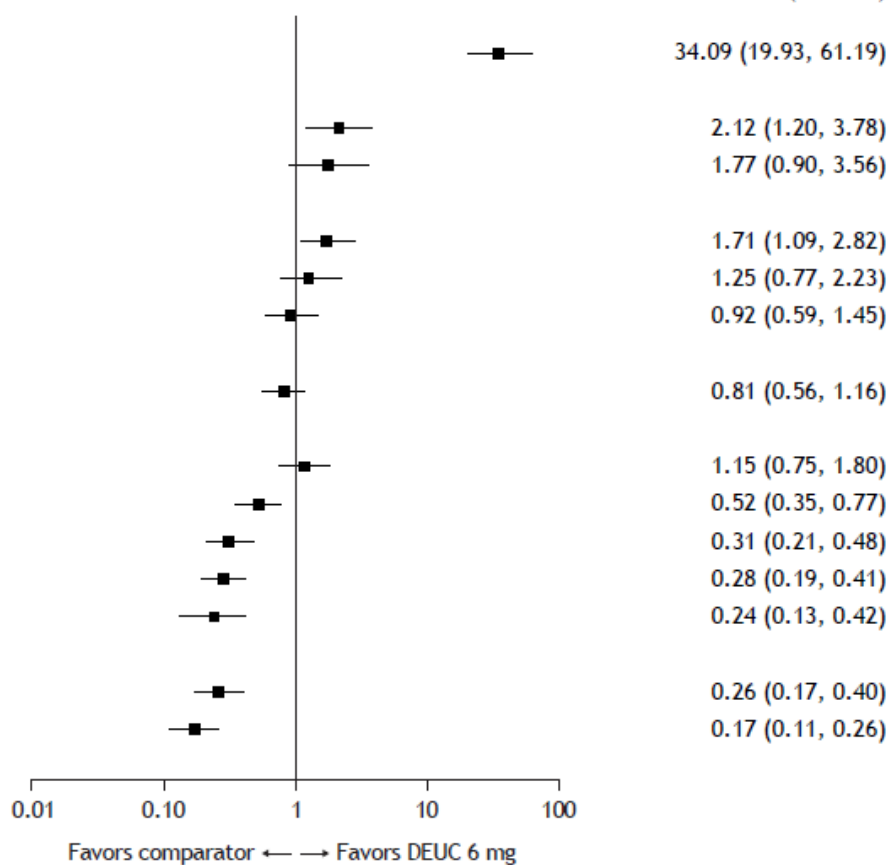

(c)

DEUC 6 mg vs:

**Placebo**

PLC

**Nonbiologic**

MTX

APR 30 mg

**TNF- $\alpha$  inhibitors**

ETC 50 mg BIW

IFX 5 mg/kg

ADM 40 mg

**IL-12/IL-23 inhibitors**

UST 45 or 90 mg

**IL-17 inhibitors**

SEC 150 mg

SEC 300 mg

IXE 80 mg Q2W>Q4W

BIM 320 mg Q4W>Q8W

BRO 210 mg

**IL-23 inhibitors**

GUS 100 mg

RIS 150 mg

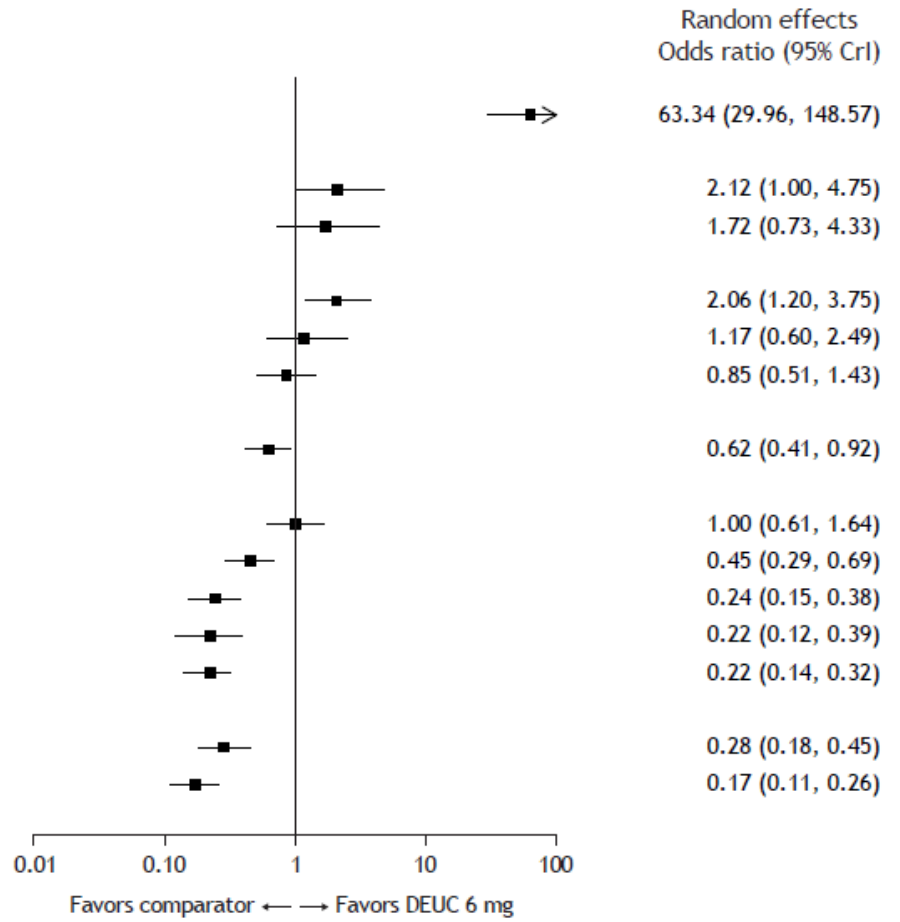

**Figure S5. Sensitivity: short-term results for (a) PASI 50, (b) PASI 75, (c) PASI 90, and (d) PASI 100.**

(a)

DEUC 6 mg vs:

Random effects  
Odds ratio (95% CrI)

**Placebo**

PLC

14.85 (9.87, 22.62)

**Nonbiologic**

ACT

3.41 (1.40, 8.43)

DMF

2.45 (1.30, 4.57)

APR 30 mg

2.35 (1.61, 3.47)

MTX

2.08 (1.30, 3.35)

CSP

1.62 (0.84, 3.08)

**TNF- $\alpha$  inhibitors**

ETC 25 mg BIW/50 mg QW

1.58 (1.01, 2.48)

ETC 50 mg BIW

0.99 (0.66, 1.50)

ADM 40 mg

0.51 (0.32, 0.83)

CZP 200 mg

0.43 (0.23, 0.78)

IFX 5 mg/kg

0.33 (0.20, 0.53)

CZP 400 mg

0.27 (0.15, 0.48)

**IL-12/IL-23 inhibitors**

UST 90 mg

0.44 (0.27, 0.73)

UST 45 or 90 mg

0.42 (0.24, 0.71)

**IL-23 inhibitors**

TIL 100 mg

0.65 (0.36, 1.16)

TIL 200 mg

0.54 (0.30, 0.98)

GUS 100 mg

0.14 (0.08, 0.26)

RIS 150 mg

0.10 (0.05, 0.19)

**IL-17 inhibitors**

SEC 150 mg

0.37 (0.20, 0.65)

SEC 300 mg

0.18 (0.10, 0.31)

BRO 210 mg

0.13 (0.07, 0.23)

IXE 80 mg Q2W

0.09 (0.05, 0.17)

BIM 320 mg

0.06 (0.03, 0.12)

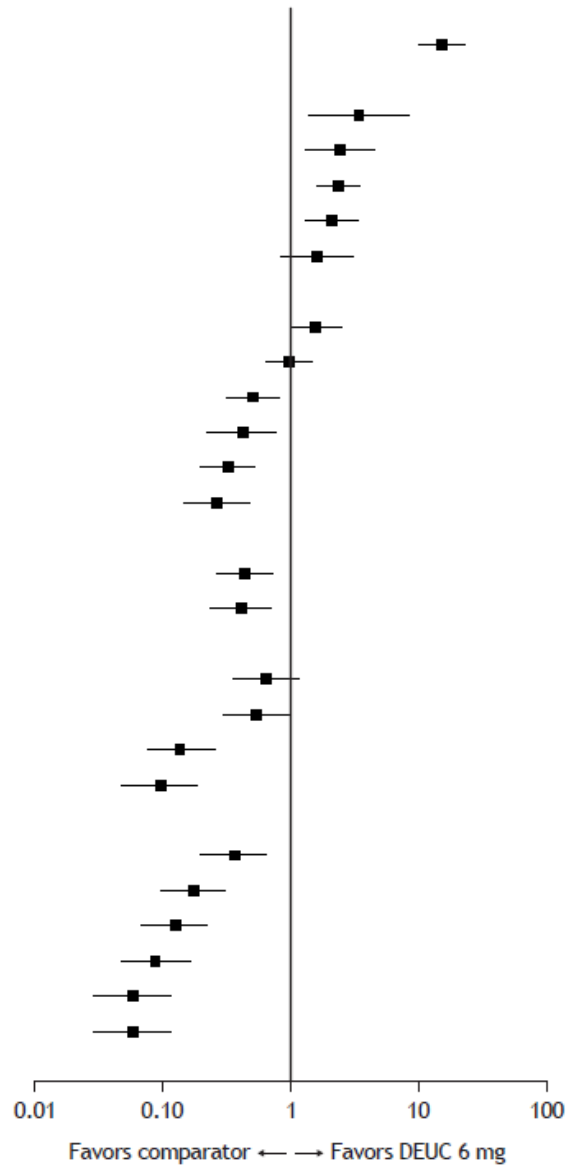

(b)

DEUC 6 mg vs:

**Placebo**

PLC

**Nonbiologic**

ACT

APR 30 mg

DMF

MTX

CSP

**TNF-alpha inhibitors**

ETC 25 mg BIW/50 mg QW

ETC 50 mg BIW

ADM 40 mg

CZP 200 mg

CZP 400 mg

IFX 5 mg/kg

**IL-12/IL-23 inhibitors**

UST 90 mg

UST 45 or 90 mg

**IL-23 inhibitors**

TIL 100 mg

TIL 200 mg

GUS 100 mg

RIS 150 mg

**IL-17 inhibitors**

SEC 150 mg

SEC 300 mg

BRO 210 mg

IXE 80 mg Q2W

BIM 320 mg

Random effects  
Odds ratio (95% CrI)

19.21 (12.74, 29.10)

3.87 (1.55, 10.28)

2.46 (1.75, 3.44)

2.01 (1.09, 3.71)

1.93 (1.26, 3.00)

1.70 (0.93, 3.14)

1.93 (1.28, 2.89)

1.13 (0.79, 1.62)

0.50 (0.35, 0.72)

0.46 (0.30, 0.73)

0.31 (0.20, 0.48)

0.29 (0.19, 0.45)

0.48 (0.31, 0.74)

0.45 (0.31, 0.66)

0.68 (0.43, 1.04)

0.57 (0.37, 0.90)

0.18 (0.12, 0.28)

0.13 (0.09, 0.20)

0.40 (0.26, 0.62)

0.20 (0.13, 0.29)

0.16 (0.10, 0.24)

0.12 (0.08, 0.19)

0.09 (0.05, 0.15)

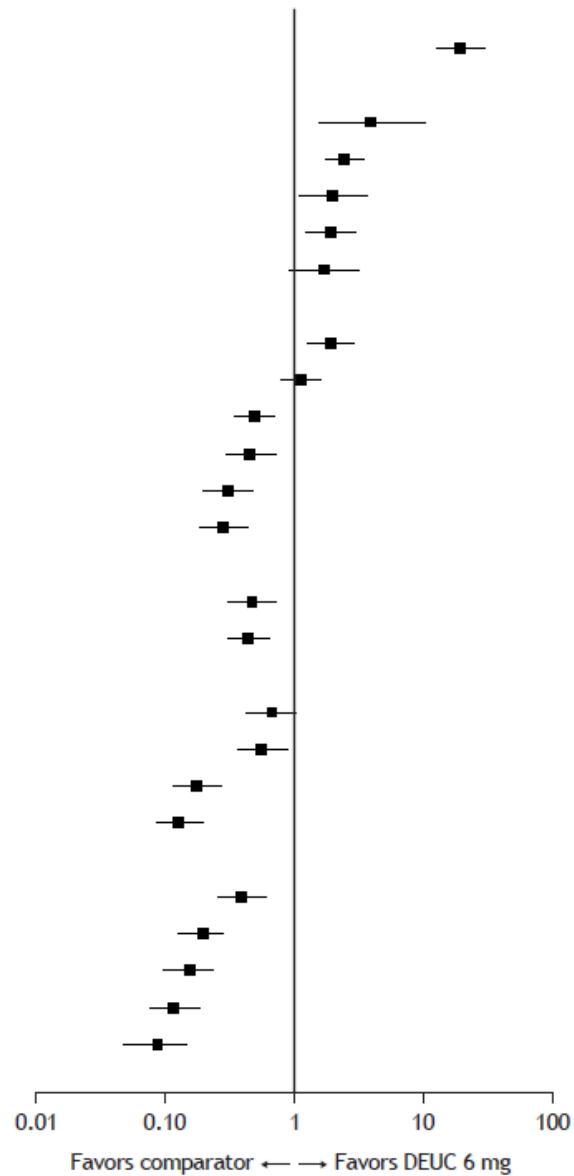

(c)

DEUC 6 mg vs:

Random effects  
Odds ratio (95% CrI)

**Placebo**

PLC

25.01 (15.61, 40.30)

**Nonbiologic**

ACT

4.66 (1.58, 16.15)

APR 30 mg

3.02 (2.08, 4.35)

MTX

2.10 (1.31, 3.41)

DMF

2.01 (1.03, 4.00)

CSP

2.00 (1.02, 4.08)

**TNF-alpha inhibitors**

ETC 25 mg BIW/50 mg QW

2.45 (1.55, 3.90)

ETC 50 mg BIW

1.35 (0.92, 1.94)

CZP 200 mg

0.52 (0.33, 0.80)

ADM 40 mg

0.49 (0.33, 0.72)

CZP 400 mg

0.37 (0.24, 0.56)

IFX 5 mg/kg

0.34 (0.22, 0.51)

**IL-12/IL-23 inhibitors**

UST 90 mg

0.54 (0.35, 0.83)

UST 45 or 90 mg

0.48 (0.32, 0.69)

**IL-23 inhibitors**

TIL 100 mg

0.68 (0.43, 1.06)

TIL 200 mg

0.61 (0.39, 0.96)

GUS 100 mg

0.20 (0.13, 0.31)

RIS 150 mg

0.15 (0.10, 0.23)

**IL-17 inhibitors**

SEC 150 mg

0.45 (0.29, 0.68)

SEC 300 mg

0.21 (0.14, 0.31)

IXE 80 mg Q2W

0.15 (0.10, 0.22)

BRO 210 mg

0.14 (0.09, 0.22)

BIM 320 mg

0.08 (0.05, 0.12)

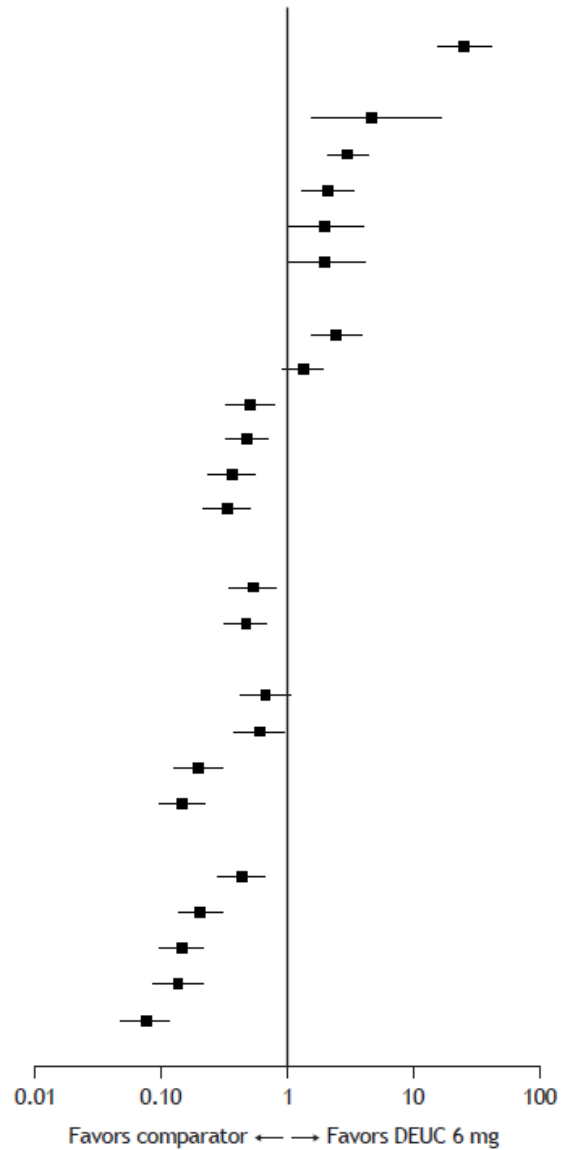

(d)

DEUC 6 mg vs:

Random effects  
Odds ratio (95% CrI)

**Placebo**

PLC

43.05 (22.27, 84.42)

**Nonbiologic**

ACT

8.30 (2.03, 44.26)

APR 30 mg

4.95 (2.91, 8.56)

CSP

2.85 (1.16, 7.74)

DMF

2.85 (1.17, 7.53)

MTX

2.52 (1.29, 4.96)

**TNF-alpha inhibitors**

ETC 25 mg BIW/50 mg QW

3.68 (1.84, 7.57)

ETC 50 mg BIW

1.68 (1.03, 2.68)

CZP 200 mg

0.61 (0.35, 1.07)

ADM 40 mg

0.54 (0.34, 0.84)

CZP 400 mg

0.45 (0.26, 0.78)

IFX 5 mg/kg

0.36 (0.20, 0.64)

**IL-12/IL-23 inhibitors**

UST 90 mg

0.66 (0.39, 1.13)

UST 45 or 90 mg

0.48 (0.30, 0.76)

**IL-23 inhibitors**

TIL 100 mg

0.74 (0.42, 1.28)

TIL 200 mg

0.66 (0.38, 1.15)

GUS 100 mg

0.24 (0.14, 0.37)

RIS 150 mg

0.16 (0.10, 0.25)

**IL-17 inhibitors**

SEC 150 mg

0.57 (0.34, 0.95)

SEC 300 mg

0.23 (0.15, 0.36)

IXE 80 mg Q2W

0.17 (0.11, 0.27)

BRO 210 mg

0.14 (0.08, 0.22)

BIM 320 mg

0.08 (0.05, 0.13)

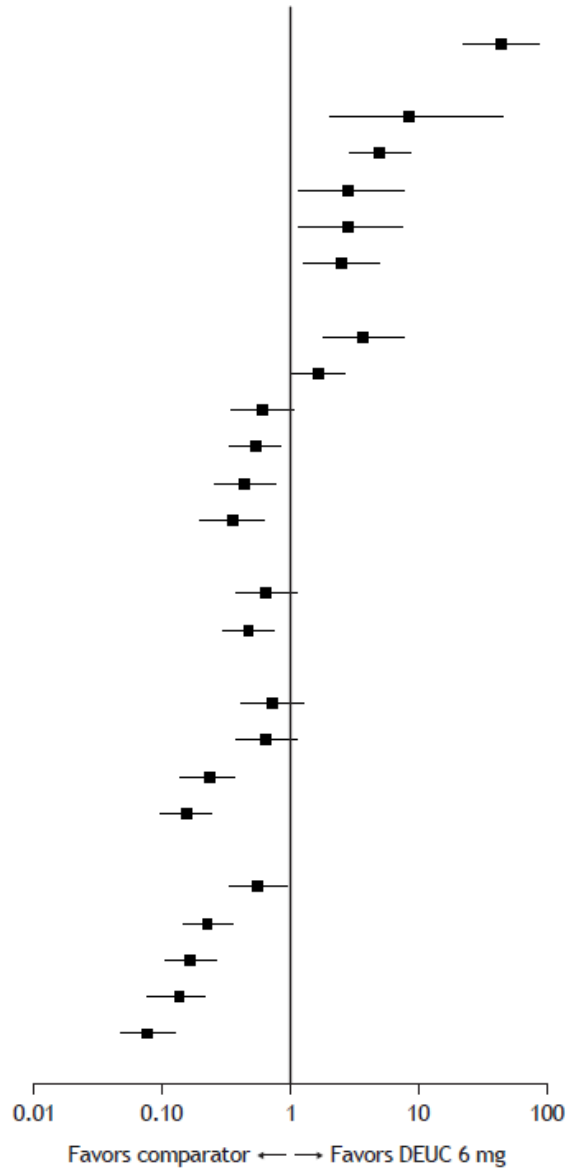

**Figure S6. Sensitivity: mid-term results for (a) PASI 50, (b) PASI 75, (c) PASI 90, and (d) PASI 100.**

(a)

DEUC 6 mg vs:

**Placebo**

PLC

**Nonbiologic**

APR 30 mg

ACT

MTX

**TNF-alpha inhibitors**

ETC 25 mg BIW/50 mg QW

ETC 50 mg BIW

ADM 40 mg

IFX 5 mg/kg

**IL-12/IL-23 inhibitors**

UST 45 or 90 mg

UST 90 mg

**IL-17 inhibitors**

SEC 150 mg

IXE 80 mg Q2W>Q4W

SEC 300 mg

BRO 210 mg

BIM 320 mg Q4W>Q8W

**IL-23 inhibitors**

TIL 100 mg

TIL 200 mg

GUS 100 mg

RIS 150 mg

Random effects  
Odds ratio (95% CrI)

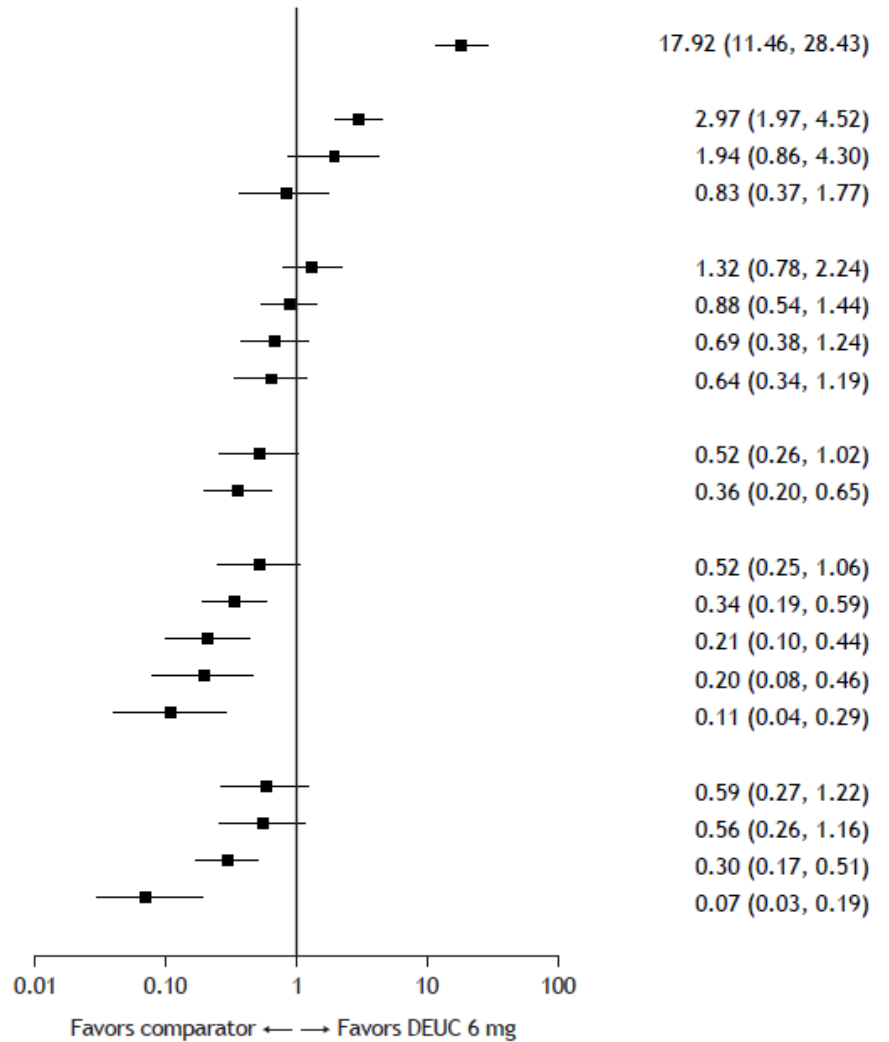



(b)

DEUC 6 mg vs:

**Placebo**

PLC

**Nonbiologic**

APR 30 mg

ACT

MTX

**TNF-alpha inhibitors**

ETC 25 mg BIW/50 mg QW

ETC 50 mg BIW

ADM 40 mg

IFX 5 mg/kg

**IL-12/IL-23 inhibitors**

UST 90 mg

UST 45 or 90 mg

**IL-17 inhibitors**

SEC 150 mg

SEC 300 mg

BRO 210 mg

IXE 80 mg Q2W>Q4W

BIM 320 mg Q4W>Q8W

**IL-23 inhibitors**

TIL 100 mg

TIL 200 mg

GUS 100 mg

RIS 150 mg

Random effects  
Odds ratio (95% CrI)

28.70 (18.11, 45.68)

3.34 (2.33, 4.76)

2.30 (1.08, 5.01)

0.89 (0.45, 1.72)

1.64 (1.04, 2.58)

1.28 (0.84, 1.92)

0.63 (0.42, 0.96)

0.51 (0.30, 0.89)

0.59 (0.36, 0.96)

0.58 (0.38, 0.88)

0.57 (0.36, 0.92)

0.26 (0.17, 0.40)

0.24 (0.14, 0.42)

0.23 (0.14, 0.38)

0.14 (0.07, 0.29)

0.64 (0.39, 1.05)

0.61 (0.37, 1.00)

0.21 (0.13, 0.34)

0.11 (0.06, 0.19)

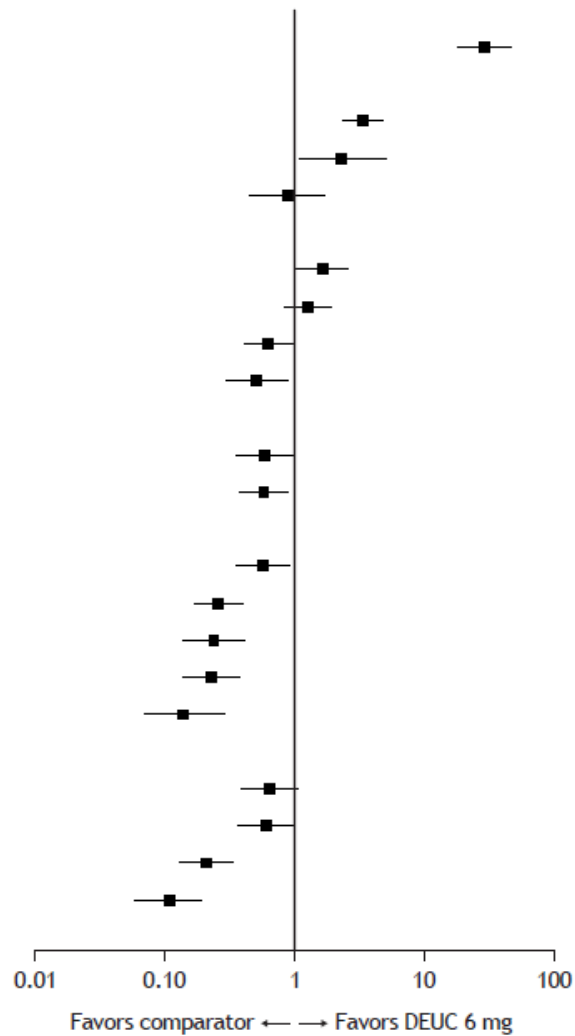

(c)

DEUC 6 mg vs:

**Placebo**

PLC

**Nonbiologic**

APR 30 mg

ACT

MTX

**TNF-alpha inhibitors**

ETC 25 mg BIW/50 mg QW

ETC 50 mg BIW

ADM 40 mg

IFX 5 mg/kg

**IL-12/IL-23 inhibitors**

UST 90 mg

UST 45 or 90 mg

**IL-17 inhibitors**

SEC 150 mg

SEC 300 mg

IXE 80 mg Q2W>Q4W

BRO 210 mg

BIM 320 mg Q4W>Q8W

**IL-23 inhibitors**

TIL 100 mg

TIL 200 mg

GUS 100 mg

RIS 150 mg

Random effects  
Odds ratio (95% CrI)

32.10 (19.07, 54.30)

2.85 (1.95, 4.20)

1.96 (0.81, 5.11)

0.99 (0.50, 1.95)

1.75 (1.07, 2.84)

1.30 (0.85, 1.97)

0.46 (0.30, 0.69)

0.46 (0.27, 0.79)

0.54 (0.33, 0.87)

0.45 (0.30, 0.68)

0.52 (0.33, 0.83)

0.24 (0.16, 0.36)

0.18 (0.11, 0.28)

0.17 (0.10, 0.28)

0.10 (0.05, 0.19)

0.57 (0.35, 0.91)

0.47 (0.29, 0.76)

0.18 (0.11, 0.27)

0.12 (0.07, 0.20)

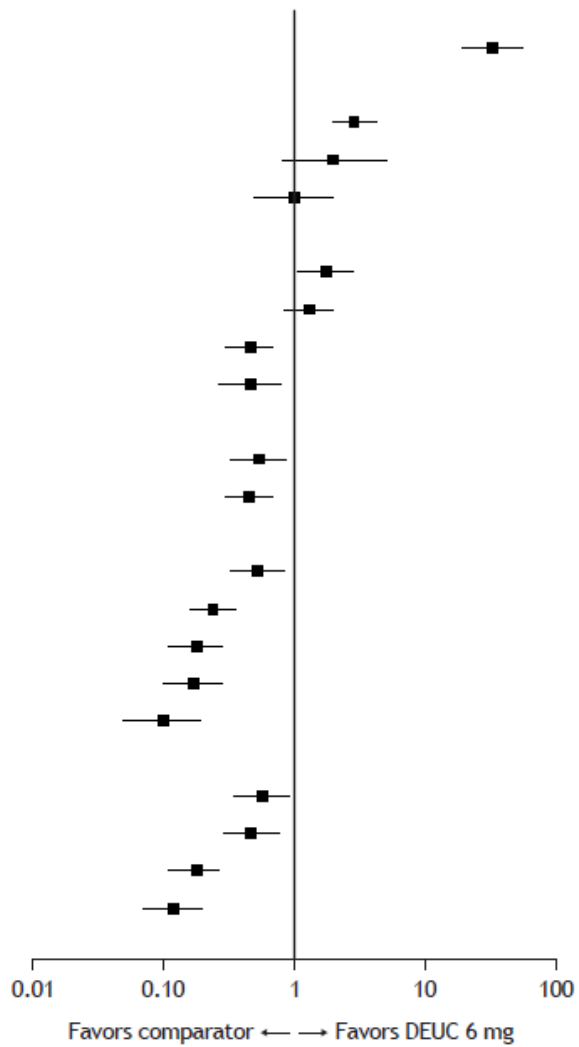

(d)

DEUC 6 mg vs:

**Placebo**

PLC

**Nonbiologic**

APR 30 mg

ACT

MTX

**TNF-alpha inhibitors**

ETC 25 mg BIW/50 mg QW

ETC 50 mg BIW

ADM 40 mg

IFX 5 mg/kg

**IL-12/IL-23 inhibitors**

UST 90 mg

UST 45 or 90 mg

**IL-17 inhibitors**

SEC 150 mg

SEC 300 mg

IXE 80 mg Q2W>Q4W

BRO 210 mg

BIM 320 mg Q4W>Q8W

**IL-23 inhibitors**

TIL 100 mg

TIL 200 mg

GUS 100 mg

RIS 150 mg

Random effects  
Odds ratio (95% CrI)

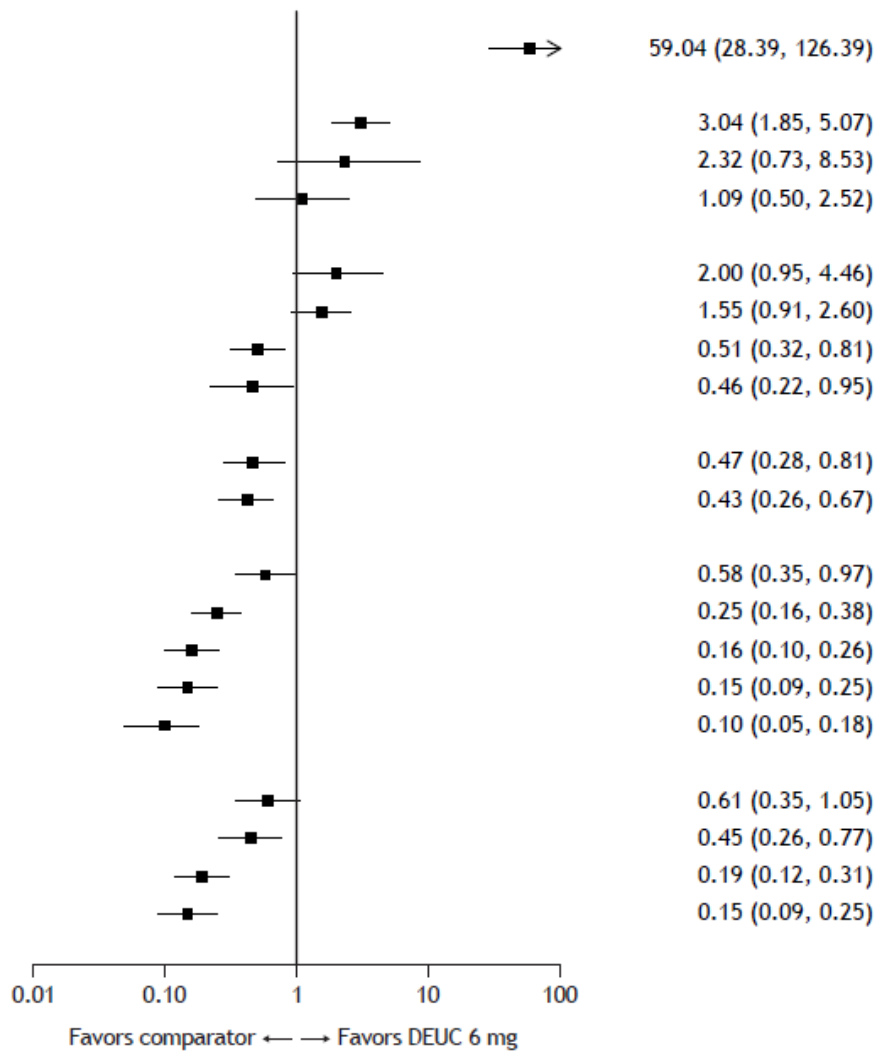

**Figure S7. Sensitivity: long-term results for (a) PASI 50, (b) PASI 75, (c) PASI 90, and (d) PASI 100.**

(a)

DEUC 6 mg vs:

**Placebo**

PLC

**Nonbiologic**

APR 30 mg

MTX

**TNF-alpha inhibitors**

IFX 5 mg/kg

ADM 40 mg

ETC 50 mg BIW

**IL-12/IL-23 inhibitors**

UST 45 or 90 mg

UST 90 mg

**IL-23 inhibitors**

GUS 100 mg

RIS 150 mg

**IL-17 inhibitors**

SEC 150 mg

BRO 210 mg

SEC 300 mg

IXE 80 mg Q2W>Q4W

BIM 320 mg Q4W>Q8W

Random effects  
Odds ratio (95% CrI)

19.26 (9.42, 40.44)

3.01 (1.37, 6.71)

2.49 (0.95, 6.53)

1.98 (0.80, 5.81)

1.10 (0.41, 2.82)

0.76 (0.32, 1.83)

0.69 (0.28, 1.71)

0.49 (0.13, 1.67)

0.15 (0.05, 0.42)

0.11 (0.04, 0.31)

0.79 (0.30, 2.15)

0.34 (0.12, 0.91)

0.34 (0.13, 0.93)

0.27 (0.09, 0.73)

0.18 (0.04, 0.66)

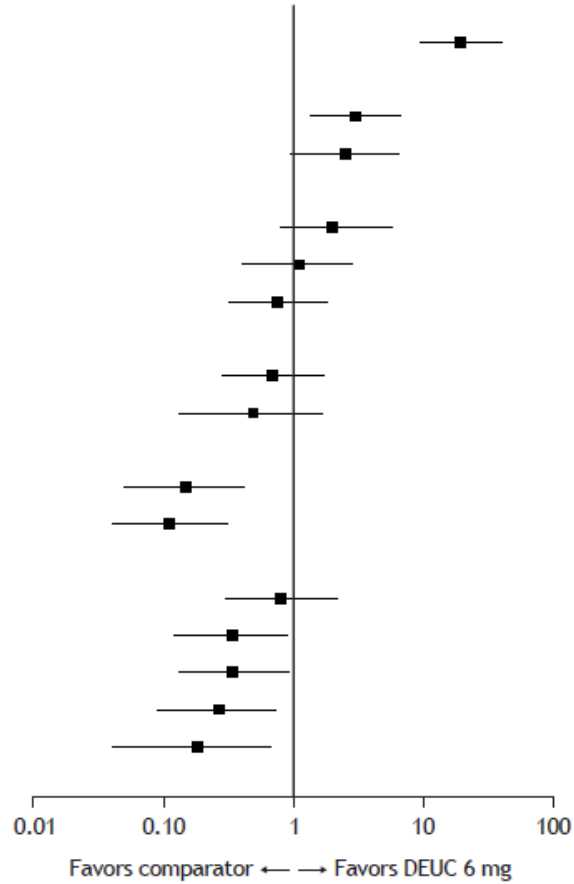

(b)

DEUC 6 mg vs:

**Placebo**

PLC

**Nonbiologic**

APR 30 mg

MTX

**TNF-alpha inhibitors**

IFX 5 mg/kg

ETC 50 mg BIW

ADM 40 mg

**IL-12/IL-23 inhibitors**

UST 45 or 90 mg

UST 90 mg

**IL-23 inhibitors**

GUS 100 mg

RIS 150 mg

**IL-17 inhibitors**

SEC 150 mg

BRO 210 mg

SEC 300 mg

IXE 80 mg Q2W>Q4W

BIM 320 mg Q4W>Q8W

Random effects  
Odds ratio (95% CrI)

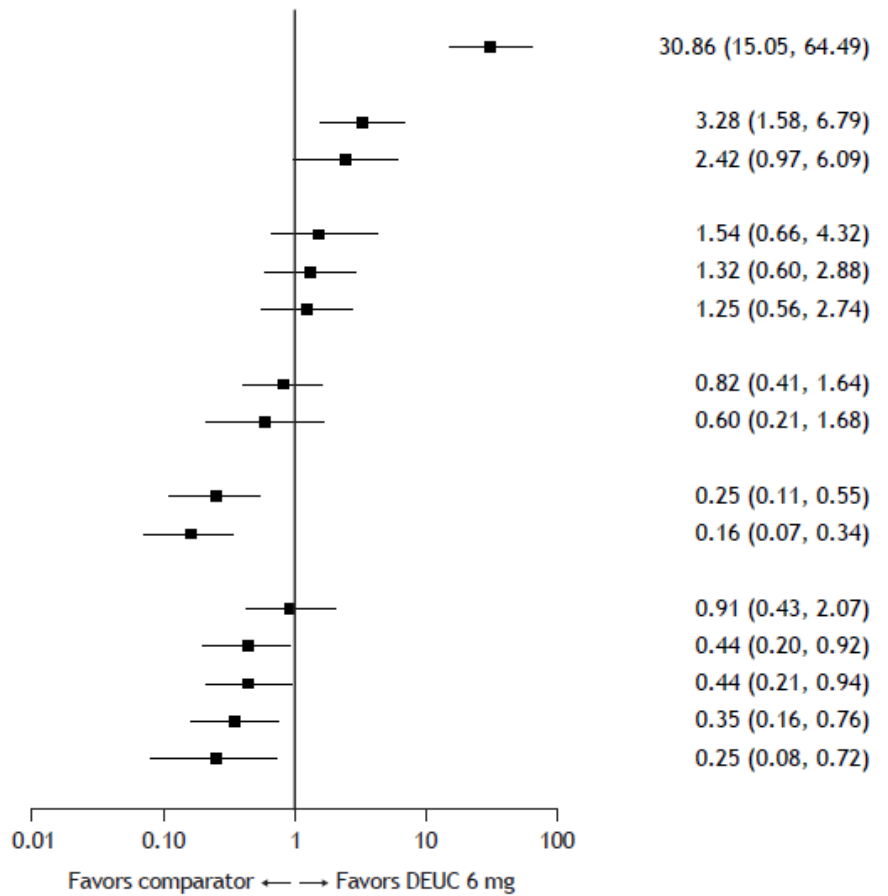

(c)

DEUC 6 mg vs:

**Placebo**

PLC

**Nonbiologic**

APR 30 mg

MTX

**TNF-alpha inhibitors**

ETC 50 mg BIW

IFX 5 mg/kg

ADM 40 mg

**IL-12/IL-23 inhibitors**

UST 45 or 90 mg

UST 90 mg

**IL-23 inhibitors**

GUS 100 mg

RIS 150 mg

**IL-17 inhibitors**

SEC 150 mg

SEC 300 mg

IXE 80 mg Q2W>Q4W

BRO 210 mg

BIM 320 mg Q4W>Q8W

Random effects  
Odds ratio (95% CrI)

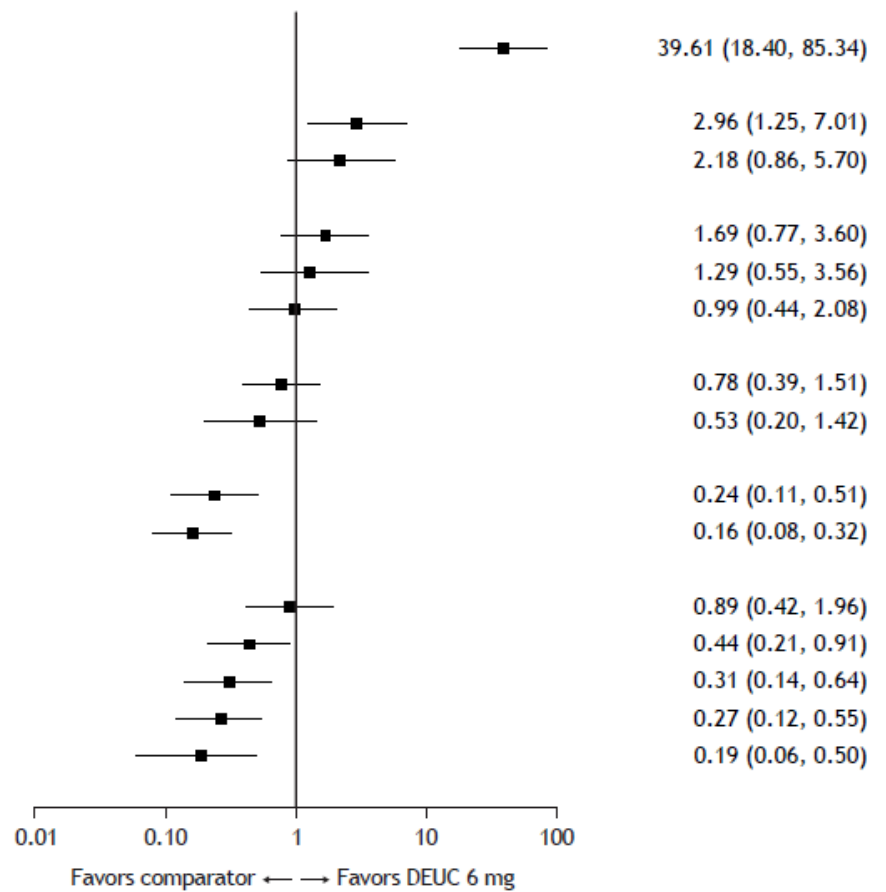

(d)

DEUC 6 mg vs:

**Placebo**

PLC

**Nonbiologic**

APR 30 mg

MTX

**TNF-alpha inhibitors**

ETC 50 mg BIW

IFX 5 mg/kg

ADM 40 mg

**IL-12/IL-23 inhibitors**

UST 45 or 90 mg

UST 90 mg

**IL-23 inhibitors**

GUS 100 mg

RIS 150 mg

**IL-17 inhibitors**

SEC 150 mg

SEC 300 mg

IXE 80 mg Q2W>Q4W

BRO 210 mg

BIM 320 mg Q4W>Q8W

Random effects  
Odds ratio (95% CrI)

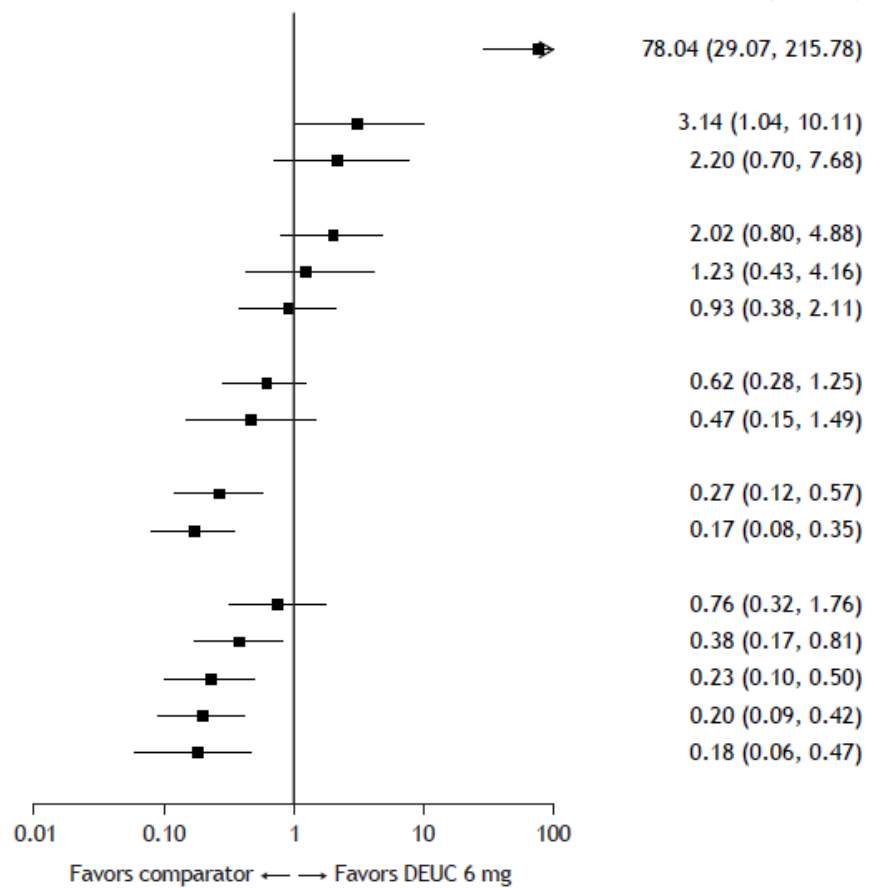

**Figure S8. Main analysis: PASI 75 at a short-term time point (10–16 weeks) in patients who were biologic naïve.**

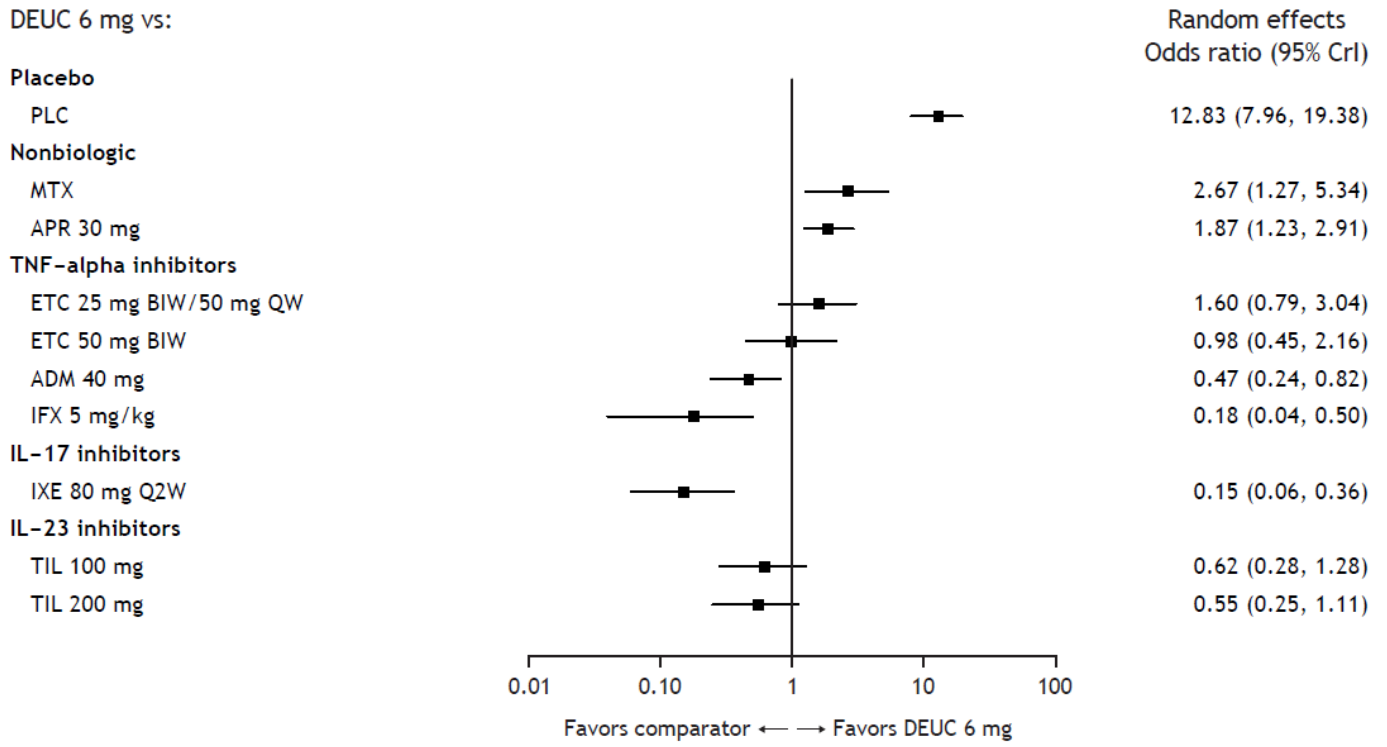



**Table S1. PRISMA checklist.**

| Section and Topic             | Item # | Checklist item                                                                                                                                                                                                                                                                                       | Location where item is reported |
|-------------------------------|--------|------------------------------------------------------------------------------------------------------------------------------------------------------------------------------------------------------------------------------------------------------------------------------------------------------|---------------------------------|
| <b>TITLE</b>                  |        |                                                                                                                                                                                                                                                                                                      |                                 |
| Title                         | 1      | Identify the report as a systematic review. Described as network meta-analysis                                                                                                                                                                                                                       | Pg 1                            |
| <b>ABSTRACT</b>               |        |                                                                                                                                                                                                                                                                                                      |                                 |
| Abstract                      | 2      | See the PRISMA 2020 for Abstracts checklist.                                                                                                                                                                                                                                                         | Pg 3-4                          |
| <b>INTRODUCTION</b>           |        |                                                                                                                                                                                                                                                                                                      |                                 |
| Rationale                     | 3      | Describe the rationale for the review in the context of existing knowledge.                                                                                                                                                                                                                          | Pg 5                            |
| Objectives                    | 4      | Provide an explicit statement of the objective(s) or question(s) the review addresses.                                                                                                                                                                                                               | Pg 5-6                          |
| <b>METHODS</b>                |        |                                                                                                                                                                                                                                                                                                      |                                 |
| Eligibility criteria          | 5      | Specify the inclusion and exclusion criteria for the review and how studies were grouped for the syntheses.                                                                                                                                                                                          | Pg 6-7; Supplementary Table S2  |
| Information sources           | 6      | Specify all databases, registers, websites, organisations, reference lists and other sources searched or consulted to identify studies. Specify the date when each source was last searched or consulted.                                                                                            | Supplementary Table S1          |
| Search strategy               | 7      | Present the full search strategies for all databases, registers and websites, including any filters and limits used.                                                                                                                                                                                 | Supplementary Table S1          |
| Selection process             | 8      | Specify the methods used to decide whether a study met the inclusion criteria of the review, including how many reviewers screened each record and each report retrieved, whether they worked independently, and if applicable, details of automation tools used in the process.                     | Pg 6-7                          |
| Data collection process       | 9      | Specify the methods used to collect data from reports, including how many reviewers collected data from each report, whether they worked independently, any processes for obtaining or confirming data from study investigators, and if applicable, details of automation tools used in the process. | Pg 6-8                          |
| Data items                    | 10a    | List and define all outcomes for which data were sought. Specify whether all results that were compatible with each outcome domain in each study were sought (eg, for all measures, time points, analyses), and if not, the methods used to decide which results to collect.                         | Pg 7-8                          |
|                               | 10b    | List and define all other variables for which data were sought (eg, participant and intervention characteristics, funding sources). Describe any assumptions made about any missing or unclear information.                                                                                          | Pg 8-9                          |
| Study risk of bias assessment | 11     | Specify the methods used to assess risk of bias in the included studies, including details of the tool(s) used, how many reviewers assessed each study and whether they worked independently, and if applicable, details of automation tools used in the process.                                    | Pg 11                           |
| Effect measures               | 12     | Specify for each outcome the effect measure(s) (e.g. risk ratio, mean difference) used in the synthesis or presentation of results.                                                                                                                                                                  | Pg 9-11                         |
| Synthesis methods             | 13a    | Describe the processes used to decide which studies were eligible for each synthesis (e.g. tabulating the study intervention characteristics and comparing against the planned groups for each synthesis (item #5)).                                                                                 | Pg 8-9                          |
|                               | 13b    | Describe any methods required to prepare the data for presentation or synthesis, such as handling of missing summary statistics, or data conversions.                                                                                                                                                | Pg 10-11                        |
|                               | 13c    | Describe any methods used to tabulate or visually display results of individual studies and syntheses.                                                                                                                                                                                               | Pg 9-11                         |
|                               | 13d    | Describe any methods used to synthesize results and provide a rationale for the choice(s). If meta-analysis was performed, describe the model(s), method(s) to identify the presence and extent of statistical heterogeneity, and software package(s) used.                                          | Pg 9-11                         |

| Section and Topic             | Item # | Checklist item                                                                                                                                                                                                                                                                       | Location where item is reported                                                |
|-------------------------------|--------|--------------------------------------------------------------------------------------------------------------------------------------------------------------------------------------------------------------------------------------------------------------------------------------|--------------------------------------------------------------------------------|
|                               | 13e    | Describe any methods used to explore possible causes of heterogeneity among study results (e.g. subgroup analysis, meta-regression).                                                                                                                                                 | Pg 8-10                                                                        |
|                               | 13f    | Describe any sensitivity analyses conducted to assess robustness of the synthesized results.                                                                                                                                                                                         | Pg 11                                                                          |
| Reporting bias assessment     | 14     | Describe any methods used to assess risk of bias due to missing results in a synthesis (arising from reporting biases).                                                                                                                                                              | Pg 11                                                                          |
| Certainty assessment          | 15     | Describe any methods used to assess certainty (or confidence) in the body of evidence for an outcome.                                                                                                                                                                                | Pg 9-11                                                                        |
| <b>RESULTS</b>                |        |                                                                                                                                                                                                                                                                                      |                                                                                |
| Study selection               | 16a    | Describe the results of the search and selection process, from the number of records identified in the search to the number of studies included in the review, ideally using a flow diagram.                                                                                         | Pg 11, Supplementary Figure S1                                                 |
|                               | 16b    | Cite studies that might appear to meet the inclusion criteria, but which were excluded, and explain why they were excluded.                                                                                                                                                          | Supplementary Figure S1                                                        |
| Study characteristics         | 17     | Cite each included study and present its characteristics.                                                                                                                                                                                                                            | Supplementary Table S3                                                         |
| Risk of bias in studies       | 18     | Present assessments of risk of bias for each included study.                                                                                                                                                                                                                         | Pg 14; Supplementary Table S10                                                 |
| Results of individual studies | 19     | For all outcomes, present, for each study: (a) summary statistics for each group (where appropriate) and (b) an effect estimate and its precision (e.g. confidence/credible interval), ideally using structured tables or plots.                                                     | Pgs 11-14, Figures 1-4, Supplementary eTables 4-6, Supplementary Figures S2-10 |
| Results of syntheses          | 20a    | For each synthesis, briefly summarise the characteristics and risk of bias among contributing studies.                                                                                                                                                                               | Pg 14                                                                          |
|                               | 20b    | Present results of all statistical syntheses conducted. If meta-analysis was done, present for each the summary estimate and its precision (e.g. confidence/credible interval) and measures of statistical heterogeneity. If comparing groups, describe the direction of the effect. | Pgs 12-14, Figures 1-4, Supplementary Tables S4-6, Supplementary Figures S2-10 |
|                               | 20c    | Present results of all investigations of possible causes of heterogeneity among study results.                                                                                                                                                                                       | Pg 13-14, Supplementary Figures S5-10                                          |
|                               | 20d    | Present results of all sensitivity analyses conducted to assess the robustness of the synthesized results.                                                                                                                                                                           | Pg 14, Supplementary Figures S5-7                                              |
| Reporting biases              | 21     | Present assessments of risk of bias due to missing results (arising from reporting biases) for each synthesis assessed.                                                                                                                                                              | Pg 14                                                                          |
| Certainty of evidence         | 22     | Present assessments of certainty (or confidence) in the body of evidence for each outcome assessed.                                                                                                                                                                                  | Pgs 12-14, Figures 1-4, Supplementary Tables S4-6, Supplementary Figures S2-10 |
| <b>DISCUSSION</b>             |        |                                                                                                                                                                                                                                                                                      |                                                                                |
| Discussion                    | 23a    | Provide a general interpretation of the results in the context of other evidence.                                                                                                                                                                                                    | Pg 14-17                                                                       |
|                               | 23b    | Discuss any limitations of the evidence included in the review.                                                                                                                                                                                                                      | Pg 16-17                                                                       |
|                               | 23c    | Discuss any limitations of the review processes used.                                                                                                                                                                                                                                | Pg 16-17                                                                       |

| <b>Section and Topic</b>                       | <b>Item #</b> | <b>Checklist item</b>                                                                                                                                                                                                                      | <b>Location where item is reported</b> |
|------------------------------------------------|---------------|--------------------------------------------------------------------------------------------------------------------------------------------------------------------------------------------------------------------------------------------|----------------------------------------|
|                                                | 23d           | Discuss implications of the results for practice, policy, and future research.                                                                                                                                                             | Pg 17-18                               |
| <b>OTHER INFORMATION</b>                       |               |                                                                                                                                                                                                                                            |                                        |
| Registration and protocol                      | 24a           | Provide registration information for the review, including register name and registration number, or state that the review was not registered.                                                                                             | NA                                     |
|                                                | 24b           | Indicate where the review protocol can be accessed, or state that a protocol was not prepared.                                                                                                                                             | Pg 6                                   |
|                                                | 24c           | Describe and explain any amendments to information provided at registration or in the protocol.                                                                                                                                            | NA                                     |
| Support                                        | 25            | Describe sources of financial or non-financial support for the review, and the role of the funders or sponsors in the review.                                                                                                              | Pg 21                                  |
| Competing interests                            | 26            | Declare any competing interests of review authors.                                                                                                                                                                                         | Pg 22-23                               |
| Availability of data, code and other materials | 27            | Report which of the following are publicly available and where they can be found: template data collection forms; data extracted from included studies; data used for all analyses; analytic code; any other materials used in the review. | Pg 6                                   |

**Table S2. Search strategies.**

| Search Number                               | Search Terms                                                                                                           | Results |
|---------------------------------------------|------------------------------------------------------------------------------------------------------------------------|---------|
| <b>Medline (via OvidSP) Search Strategy</b> |                                                                                                                        |         |
| 1                                           | exp psoriasis/ or psoria\$.ti,ab.                                                                                      | 59,003  |
| 2                                           | BMS-986165.ti,ab.                                                                                                      | 6       |
| 3                                           | exp certolizumab pegol/ or (certolizumab pegol or Cimzia or CDP870 or CDP-870).ti,ab.                                  | 1121    |
| 4                                           | exp adalimumab/ or (adalimumab\$ or Humira or d2e7).ti,ab.                                                             | 9395    |
| 5                                           | exp etanercept/ or (etanercept\$ or Enbrel or Embrel or Benepali).ti,ab.                                               | 9072    |
| 6                                           | exp brodalumab/ or (brodalumab or Siliq or Kyntheum or KHK4827 or KHK-4827 or AMG-827 or AMG827).ti,ab.                | 356     |
| 7                                           | exp ixekizumab/ or (ixekizumab or Taltz or ly2439821 or ly-2439821).ti,ab.                                             | 646     |
| 8                                           | exp secukinumab/ or (secukinumab or Cosentyx or ain457 or ain-457).ti,ab.                                              | 1322    |
| 9                                           | exp guselkumab/ or (guselkumab or Tremfya or cnto-1959 or cnto1959).ti,ab.                                             | 305     |
| 10                                          | exp ustekinumab/ or (ustekinumab or Stelara or cnto-1275 or cnto1275).ti,ab.                                           | 2400    |
| 11                                          | exp tildrakizumab/ or (tildrakizumab or Ilumya or Ilumetri or mk-3222 or mk3222 or sch-900222 or sch900222).ti,ab.     | 155     |
| 12                                          | exp risankizumab/ or (risankizumab or bi 655066 or bi655066 or abbv-066 or abbv066).ti,ab.                             | 190     |
| 13                                          | exp bimekizumab/ or (bimekizumab or UCB4940 or UCB-4940).ti,ab.                                                        | 55      |
| 14                                          | exp infliximab/ or (infliximab or Remicade or Renflexis or Inflectra or ca2).ti,ab.                                    | 167,855 |
| 15                                          | exp apremilast/ or (apremilast or Otezla or cc-10004 or cc10004).ti,ab.                                                | 759     |
| 16                                          | exp interleukin 23p19/ or (interleukin 23p19 or interleukin23p19 or interleukin-23p19 or IL-23p19 or IL-23 p19).ti,ab. | 619     |
| 17                                          | exp methotrexate/ or methotrexate.ti,ab.                                                                               | 56,646  |
| 18                                          | exp cyclosporine/ or cyclosporine.ti,ab.                                                                               | 46,688  |
| 19                                          | exp fumaric acid dimethyl ester/ or dimethyl fumarate.ti,ab.                                                           | 1153    |
| 20                                          | exp etretin/ or (acitretin or Soriatane or Neotigason).ti,ab.                                                          | 1850    |
| 21                                          | interleukin.mp.                                                                                                        | 369,471 |
| 22                                          | biologic\$.ti,ab.                                                                                                      | 941,852 |
| 23                                          | exp mirikizumab/ or (mirikizumab or LY-3074828 or LY3074828).ti,ab.                                                    | 20      |

|                                             |                                                                                                                                                                  |           |
|---------------------------------------------|------------------------------------------------------------------------------------------------------------------------------------------------------------------|-----------|
| 24                                          | exp Piclidenoson/ or (Piclidenoson or 3-IB-Meca or CF-101 or CF101 or IB-Meca).ti,ab.                                                                            | 411       |
| 25                                          | or/2-24                                                                                                                                                          | 1,545,868 |
| 26                                          | ((random\$ and (assign\$ or allocate\$)) or RCT or trial or crossover or cross over or placebo or controlled study or major clinical study).ti,ab.               | 978,841   |
| 27                                          | exp randomized controlled trial/ or exp randomization/ or exp single blind procedure/ or exp double blind procedure/ or exp crossover procedure/ or exp placebo/ | 635,387   |
| 28                                          | ((doubl\$ and blind\$) or (singl\$ and blind\$)).ti,ab.                                                                                                          | 193,674   |
| 29                                          | or/26-28                                                                                                                                                         | 1,248,885 |
| 30                                          | 1 and 25 and 29                                                                                                                                                  | 2086      |
| 31                                          | (animal/ not human/) or nonhuman/ or exp animal experiment/ or exp experimental animal/ or animal model/ or exp rodent/ or (rat or rats or mouse or mice).ti.    | 5,810,577 |
| 32                                          | review.pt. not (((systematic or meta) and analy\$) or ((indirect or mixed) and treatment comparison)).ti,ab.                                                     | 2,761,908 |
| 33                                          | 31 or 32                                                                                                                                                         | 8,326,898 |
| 34                                          | 30 not 33                                                                                                                                                        | 1723      |
| 35                                          | Limit 34 to English language                                                                                                                                     | 1692      |
| 36                                          | Limit 35 to (books or chapter or conference abstract or letter or note or short survey)                                                                          | 46        |
| 37                                          | 35 not 36                                                                                                                                                        | 1646      |
| 38                                          | Limit 37 to dt="20200801-20211011"                                                                                                                               | 197       |
| <b>Central (via OvidSP) Search Strategy</b> |                                                                                                                                                                  |           |
| 1                                           | exp psoriasis/ or psoria\$.ti,ab.                                                                                                                                | 9990      |
| 2                                           | BMS-986165.ti,ab.                                                                                                                                                | 65        |
| 3                                           | exp certolizumab pegol/ or (certolizumab pegol or Cimzia or CDP870 or CDP-870).ti,ab.                                                                            | 627       |
| 4                                           | exp adalimumab/ or (adalimumab\$ or Humira or d2e7).ti,ab.                                                                                                       | 3511      |
| 5                                           | exp etanercept/ or (etanercept\$ or Enbrel or Embrel or Benepali).ti,ab.                                                                                         | 2326      |
| 6                                           | (brodalumab or Siliq or Kyntheum or KHK4827 or KHK-4827 or AMG-827 or AMG827).ti,ab.                                                                             | 190       |
| 7                                           | (ixekizumab or Taltz or ly2439821 or ly-2439821).ti,ab.                                                                                                          | 575       |
| 8                                           | (secukinumab or Cosentyx or ain457 or ain-457).ti,ab.                                                                                                            | 1040      |
| 9                                           | (guselkumab or Tremfya or cnto-1959 or cnto1959).ti,ab.                                                                                                          | 343       |
| 10                                          | exp ustekinumab/ or (ustekinumab or Stelara or cnto-1275 or cnto1275).ti,ab.                                                                                     | 975       |
| 11                                          | (tildrakizumab or Ilumya or Ilumetri or mk-3222 or mk3222 or sch-900222 or sch900222).ti,ab.                                                                     | 187       |
| 12                                          | (risankizumab or bi 655066 or bi655066 or abbv-066 or abbv066).ti,ab.                                                                                            | 157       |
| 13                                          | (bimekizumab or UCB4940 or UCB-4940).ti,ab.                                                                                                                      | 107       |
| 14                                          | exp infliximab/ or (infliximab or Remicade or Renflexis or Inflectra or ca2).ti,ab.                                                                              | 3135      |
| 15                                          | (apremilast or Otezla or cc-10004 or cc10004).ti,ab.                                                                                                             | 492       |

|                                          |                                                                                                                                                               |           |
|------------------------------------------|---------------------------------------------------------------------------------------------------------------------------------------------------------------|-----------|
| 16                                       | exp Interleukin-23 subunit p19/ or (interleukin 23p19 or interleukin23p19 or interleukin-23p19 or IL-23p19 or IL-23 p19).ti,ab.                               | 211       |
| 17                                       | exp methotrexate/ or methotrexate.ti,ab.                                                                                                                      | 11,736    |
| 18                                       | exp cyclosporine/ or cyclosporine.ti,ab.                                                                                                                      | 5948      |
| 19                                       | exp dimethyl fumarate/ or dimethyl fumarate.ti,ab.                                                                                                            | 403       |
| 20                                       | exp acitretin/ or (acitretin or Soriatane or Neotigason).ti,ab.                                                                                               | 191       |
| 21                                       | interleukin.mp.                                                                                                                                               | 22,753    |
| 22                                       | biologic\$.ti,ab.                                                                                                                                             | 26,304    |
| 23                                       | (mirikizumab or LY-3074828 or LY3074828).ti,ab.                                                                                                               | 94        |
| 24                                       | (Piclidenoson or 3-IB-Meca or CF-101 or CF101 or IB-Meca).ti,ab.                                                                                              | 31        |
| 25                                       | or/2-24                                                                                                                                                       | 69,680    |
| 26                                       | ((random\$ and (assign\$ or allocate\$)) or RCT or trial or crossover or cross over or placebo or controlled study or major clinical study).ti,ab.            | 999,520   |
| 27                                       | exp randomized controlled trial/ or exp random allocation/ or exp single-blind method/ or exp double-blind method/ or exp crossover studies/ or exp placebos/ | 210,760   |
| 28                                       | ((doubl\$ and blind\$) or (singl\$ and blind\$)).ti,ab.                                                                                                       | 298,230   |
| 29                                       | or/26-28                                                                                                                                                      | 1,067,591 |
| 30                                       | 1 and 25 and 29                                                                                                                                               | 3805      |
| 31                                       | (animals/ not humans/) or nonhuman/ or exp animal experimentation/ or exp disease models, animal/ or exp rodent/ or (rat or rats or mouse or mice).ti.        | 3106      |
| 32                                       | review.pt. not (((systematic or meta) and analy\$) or ((indirect or mixed) and treatment comparison)).ti,ab.                                                  | 3009      |
| 33                                       | 31 or 32                                                                                                                                                      | 6040      |
| 34                                       | 30 not 33                                                                                                                                                     | 3800      |
| 35                                       | Limit 34 to English language                                                                                                                                  | 3008      |
| 36                                       | Limit 35 to up="202008-202110"                                                                                                                                | 1296      |
|                                          | After EN removal of 2019 or prior records                                                                                                                     | 595       |
| <b>CDSR (via OVIDSP) Search Strategy</b> |                                                                                                                                                               |           |
| 1                                        | psoria\$.ti,ab.                                                                                                                                               | 39        |
| 2                                        | BMS-986165.ti,ab.                                                                                                                                             | 0         |
| 3                                        | (certolizumab pegol or Cimzia or CDP870 or CDP-870).ti,ab.                                                                                                    | 10        |
| 4                                        | (adalimumab\$ or Humira or d2e7).ti,ab.                                                                                                                       | 26        |
| 5                                        | (etanercept\$ or Enbrel or Embrel or Benepali).ti,ab.                                                                                                         | 22        |
| 6                                        | (brodalumab or Siliq or Kyntheum or KHK4827 or KHK-4827 or AMG-827 or AMG827).ti,ab.                                                                          | 1         |
| 7                                        | (ixekizumab or Taltz or ly2439821 or ly-2439821).ti,ab.                                                                                                       | 1         |
| 8                                        | (secukinumab or Cosentyx or ain457 or ain-457).ti,ab.                                                                                                         | 2         |
| 9                                        | (guselkumab or Tremfya or cnto-1959 or cnto1959).ti,ab.                                                                                                       | 2         |
| 10                                       | (ustekinumab or Stelara or cnto-1275 or cnto1275).ti,ab.                                                                                                      | 7         |

|                                                 |                                                                                              |      |
|-------------------------------------------------|----------------------------------------------------------------------------------------------|------|
| 11                                              | (tildrakizumab or Ilumya or Ilumetri or mk-3222 or mk3222 or sch-900222 or sch900222).ti,ab. | 0    |
| 12                                              | (risankizumab or bi 655066 or bi655066 or abbv-066 or abbv066).ti,ab.                        | 1    |
| 13                                              | (bimekizumab or UCB4940 or UCB-4940).ti,ab.                                                  | 1    |
| 14                                              | (infliximab or Remicade or Renflexis or Inflectra or ca2).ti,ab.                             | 43   |
| 15                                              | (apremilast or Otezla or cc-10004 or cc10004).ti,ab.                                         | 2    |
| 16                                              | (interleukin 23p19 or interleukin23p19 or interleukin-23p19 or IL-23p19 or IL-23 p19).ti,ab. | 0    |
| 17                                              | methotrexate.ti,ab.                                                                          | 71   |
| 18                                              | cyclosporine.ti,ab.                                                                          | 21   |
| 19                                              | dimethyl fumarate.ti,ab.                                                                     | 7    |
| 20                                              | (acitretin or Soriatane or Neotigason).ti,ab.                                                | 4    |
| 21                                              | interleukin.mp.                                                                              | 388  |
| 22                                              | biologic\$.ti,ab.                                                                            | 226  |
| 23                                              | (mirikizumab or LY-3074828 or LY3074828).ti,ab.                                              | 1    |
| 24                                              | (Piclidenoson or 3-IB-Meca or CF-101 or CF101 or IB-Meca).ti,ab.                             | 0    |
| 25                                              | or/2-24                                                                                      | 660  |
| 26                                              | 1 and 25                                                                                     | 24   |
| 27                                              | 202008\$.up. or 202009\$.up. or 202010\$.up. or 202011\$.up. or 202012\$.up. or 2021\$.up.   | 1694 |
| 28                                              | 26 and 27                                                                                    | 3    |
| <b>PsycINFO (via EBSCOhost) Search Strategy</b> |                                                                                              |      |
| 1                                               | psoria\$.ti,ab.                                                                              | 695  |
| 2                                               | BMS-986165.ti,ab.                                                                            | 0    |
| 3                                               | (certolizumab pegol or Cimzia or CDP870 or CDP-870).ti,ab.                                   | 2    |
| 4                                               | (adalimumab\$ or Humira or d2e7).ti,ab.                                                      | 31   |
| 5                                               | (etanercept\$ or Enbrel or Embrel or Benepali).ti,ab.                                        | 123  |
| 6                                               | (brodalumab or Siliq or Kyntheum or KHK4827 or KHK-4827 or AMG-827 or AMG827).ti,ab.         | 2    |
| 7                                               | (ixekizumab or Taltz or ly2439821 or ly-2439821).ti,ab.                                      | 4    |
| 8                                               | (secukinumab or Cosentyx or ain457 or ain-457).ti,ab.                                        | 4    |
| 9                                               | (guselkumab or Tremfya or cnto-1959 or cnto1959).ti,ab.                                      | 1    |
| 10                                              | (ustekinumab or Stelara or cnto-1275 or cnto1275).ti,ab.                                     | 6    |
| 11                                              | (tildrakizumab or Ilumya or Ilumetri or mk-3222 or mk3222 or sch-900222 or sch900222).ti,ab. | 0    |
| 12                                              | (risankizumab or bi 655066 or bi655066 or abbv-066 or abbv066).ti,ab.                        | 0    |
| 13                                              | (bimekizumab or UCB4940 or UCB-4940).ti,ab.                                                  | 0    |
| 14                                              | (infliximab or Remicade or Renflexis or Inflectra or ca2).ti,ab.                             | 9770 |
| 15                                              | (apremilast or Otezla or cc-10004 or cc10004).ti,ab.                                         | 5    |
| 16                                              | (interleukin 23p19 or interleukin23p19 or interleukin-23p19 or IL-23p19 or IL-23 p19).ti,ab. | 14   |

|                                            |                                                                                                                                                    |         |
|--------------------------------------------|----------------------------------------------------------------------------------------------------------------------------------------------------|---------|
| 17                                         | methotrexate.ti,ab.                                                                                                                                | 359     |
| 18                                         | cyclosporine.ti,ab.                                                                                                                                | 241     |
| 19                                         | dimethyl fumarate.ti,ab.                                                                                                                           | 72      |
| 20                                         | (acitretin or Soriatane or Neotigason).ti,ab.                                                                                                      | 4       |
| 21                                         | interleukin.mp.                                                                                                                                    | 7703    |
| 22                                         | biologic\$.ti,ab.                                                                                                                                  | 86,583  |
| 23                                         | (mirikizumab or LY-3074828 or LY3074828).ti,ab.                                                                                                    | 0       |
| 24                                         | (Piclidenoson or 3-IB-Meca or CF-101 or CF101 or IB-Meca).ti,ab.                                                                                   | 14      |
| 25                                         | or/2-24                                                                                                                                            | 104,043 |
| 26                                         | ((random\$ and (assign\$ or allocate\$)) or RCT or trial or crossover or cross over or placebo or controlled study or major clinical study).ti,ab. | 190,189 |
| 27                                         | exp randomized controlled trial/ or exp placebo/                                                                                                   | 7062    |
| 28                                         | ((doubl\$ and blind\$) or (singl\$ and blind\$)).ti,ab.                                                                                            | 28,860  |
| 29                                         | or/26-28                                                                                                                                           | 195,789 |
| 30                                         | 1 and 25 and 29                                                                                                                                    | 9       |
| 31                                         | Limit 30 to English                                                                                                                                | 11      |
| 32                                         | 202008\$.dp. or 202009\$.dp. or 202010\$.dp. or 202011\$.dp. or 202012\$.dp. or 2021\$.dp.                                                         | 104,351 |
| 33                                         | 31 and 32                                                                                                                                          | 0       |
| <b>Embase (via OvidSP) Search Strategy</b> |                                                                                                                                                    |         |
| 1                                          | exp psoriasis/ or psoria\$.ti,ab.                                                                                                                  | 104,787 |
| 2                                          | BMS-986165.ti,ab.                                                                                                                                  | 43      |
| 3                                          | exp certolizumab pegol/ or (certolizumab pegol or Cimzia or CDP870 or CDP-870).ti,ab.                                                              | 7707    |
| 4                                          | exp adalimumab/ or (adalimumab\$ or Humira or d2e7).ti,ab.                                                                                         | 38,708  |
| 5                                          | exp etanercept/ or (etanercept\$ or Enbrel or Embrel or Benepali).ti,ab.                                                                           | 34,792  |
| 6                                          | exp brodalumab/ or (brodalumab or Siliq or Kyntheum or KHK4827 or KHK-4827 or AMG-827 or AMG827).ti,ab.                                            | 1430    |
| 7                                          | exp ixekizumab/ or (ixekizumab or Taltz or ly2439821 or ly-2439821).ti,ab.                                                                         | 2487    |
| 8                                          | exp secukinumab/ or (secukinumab or Cosentyx or ain457 or ain-457).ti,ab.                                                                          | 5094    |
| 9                                          | exp guselkumab/ or (guselkumab or Tremfya or cnto-1959 or cnto1959).ti,ab.                                                                         | 1253    |
| 10                                         | exp ustekinumab/ or (ustekinumab or Stelara or cnto-1275 or cnto1275).ti,ab.                                                                       | 9077    |
| 11                                         | exp tildrakizumab/ or (tildrakizumab or Ilumya or Ilumetri or mk-3222 or mk3222 or sch-900222 or sch900222).ti,ab.                                 | 684     |
| 12                                         | exp risankizumab/ or (risankizumab or bi 655066 or bi655066 or abbv-066 or abbv066).ti,ab.                                                         | 686     |
| 13                                         | exp bimekizumab/ or (bimekizumab or UCB4940 or UCB-4940).ti,ab.                                                                                    | 206     |



|    |                                                                                                                                                                  |           |
|----|------------------------------------------------------------------------------------------------------------------------------------------------------------------|-----------|
| 14 | exp infliximab/ or (infliximab or Remicade or Renflexis or Inflectra or ca2).ti,ab.                                                                              | 139,365   |
| 15 | exp apremilast/ or (apremilast or Otezla or cc-10004 or cc10004).ti,ab.                                                                                          | 2751      |
| 16 | exp interleukin 23p19/ or (interleukin 23p19 or interleukin23p19 or interleukin-23p19 or IL-23 p19).ti,ab.                                                       | 2195      |
| 17 | exp methotrexate/ or methotrexate.ti,ab.                                                                                                                         | 194,075   |
| 18 | exp cyclosporine/ or cyclosporine.ti,ab.                                                                                                                         | 59,770    |
| 19 | exp fumaric acid dimethyl ester/ or dimethyl fumarate.ti,ab.                                                                                                     | 2999      |
| 20 | exp etretin/ or (acitretin or Soriatane or Neotigason).ti,ab.                                                                                                    | 7350      |
| 21 | interleukin.mp.                                                                                                                                                  | 769,557   |
| 22 | biologic\$.ti,ab.                                                                                                                                                | 1,168,218 |
| 23 | exp mirikizumab/ or (mirikizumab or LY-3074828 or LY3074828).ti,ab.                                                                                              | 156       |
| 24 | exp Piclidenoson/ or (Piclidenoson or 3-IB-Meca or CF-101 or CF101 or IB-Meca).ti,ab.                                                                            | 577       |
| 25 | or/2-24                                                                                                                                                          | 2,220,898 |
| 26 | ((random\$ and (assign\$ or allocate\$)) or RCT or trial or crossover or cross over or placebo or controlled study or major clinical study).ti,ab.               | 1,386,058 |
| 27 | exp randomized controlled trial/ or exp randomization/ or exp single blind procedure/ or exp double blind procedure/ or exp crossover procedure/ or exp placebo/ | 1,055,434 |
| 28 | ((doubl\$ and blind\$) or (singl\$ and blind\$)).ti,ab.                                                                                                          | 275,012   |
| 29 | or/26-28                                                                                                                                                         | 1,825,074 |
| 30 | 1 and 25 and 29                                                                                                                                                  | 7537      |
| 31 | (animal/ not human/) or nonhuman/ or exp animal experiment/ or exp experimental animal/ or animal model/ or exp rodent/ or (rat or rats or mouse or mice).ti.    | 8,788,108 |
| 32 | review.pt. not (((systematic or meta) and analy\$) or ((indirect or mixed) and treatment comparison)).ti,ab.                                                     | 2,687,632 |
| 33 | 31 or 32                                                                                                                                                         | 1,078,261 |
| 34 | 30 not 33                                                                                                                                                        | 5678      |
| 35 | Limit 34 to English language                                                                                                                                     | 5535      |
| 36 | American Academy of Dermatology.cf,cg.                                                                                                                           | 9055      |
| 37 | British Association of Dermatologists.cf,cg.                                                                                                                     | 4289      |
| 38 | 35 and (36 or 37)                                                                                                                                                | 543       |
| 39 | Limit 38 to dc="20200801-20211011"                                                                                                                               | 9         |

<sup>a</sup>The relevant websites for the European Society for Dermatological Research, Society for Investigative Dermatology, and World Congress of Dermatology, which are not indexed in Embase (via OvidSP) nor available online (through a searchable website or published in searchable PDF files) were also searched for available abstracts.

**Table S3. Study selection criteria.**

| Category                            | Inclusion Criteria                                                                                                                                                                    | Exclusion Criteria                                                                                                                                                                                        |
|-------------------------------------|---------------------------------------------------------------------------------------------------------------------------------------------------------------------------------------|-----------------------------------------------------------------------------------------------------------------------------------------------------------------------------------------------------------|
| Population                          | Adults ( $\geq 18$ y) with moderate to severe <sup>a</sup> PsO who are candidates for systemic therapy                                                                                | Forms of PsO other than moderate to severe; pediatric patients; studies focused only on the treatment of PsA where all patients were diagnosed with PsA; studies on patients with palmoplantar pustulosis |
| Interventions                       |                                                                                                                                                                                       | Studies that did not include a treatment arm with any of the selected comparators of interest                                                                                                             |
| Systemic biologics                  |                                                                                                                                                                                       |                                                                                                                                                                                                           |
| TNF- $\alpha$ inhibitors            | Adalimumab 40 mg EOW (with 80-mg loading dose); certolizumab pegol 400 or 200 mg Q2W (with 400-mg loading dose); etanercept 25 mg QW, 50 mg BIW, or 25 mg BIW; infliximab 5 mg/kg Q8W |                                                                                                                                                                                                           |
| IL-17 family of receptor inhibitors | Bimekizumab 320 mg Q4W; brodalumab 210 mg Q2W; ixekizumab 80 mg Q2W; mirikizumab 250 mg Q4W; secukinumab 150 or 300 mg Q4W                                                            |                                                                                                                                                                                                           |
| IL-23 inhibitors                    | Guselkumab 100 mg Q8W; risankizumab 150 mg Q12W; tildrakizumab 100 or 200 mg Q12W                                                                                                     |                                                                                                                                                                                                           |
| IL-12/23 inhibitors                 | Ustekinumab 45 or 90 mg Q12W <sup>b</sup>                                                                                                                                             |                                                                                                                                                                                                           |

|                                    |                                                                                                                                                                                          |                                                                                                                                                                                                                                      |
|------------------------------------|------------------------------------------------------------------------------------------------------------------------------------------------------------------------------------------|--------------------------------------------------------------------------------------------------------------------------------------------------------------------------------------------------------------------------------------|
| Adenosine A3 receptor antagonists  | Piclidenoson 2 or 3 mg BID                                                                                                                                                               |                                                                                                                                                                                                                                      |
| Systemic nonbiologics <sup>c</sup> | Acitretin 0.4 mg/kg; apremilast 30 mg BID; cyclosporine 2.5–5 mg/kg/day; deucravacitinib 6 mg; dimethyl fumarate 720 mg; methotrexate 7.5–15 mg                                          |                                                                                                                                                                                                                                      |
| Comparisons                        | Placebo; best supportive care; any of the above therapies                                                                                                                                | Not applicable                                                                                                                                                                                                                       |
| Outcomes                           |                                                                                                                                                                                          | Organ-specific PASI (ie, nail PASI); investigator's global assessment; other outcomes or time points not listed as being of interest                                                                                                 |
| Efficacy                           | PASI 50, 75, 90, 100                                                                                                                                                                     |                                                                                                                                                                                                                                      |
| Safety                             | Adverse and serious adverse events; malignancies; infections; treatment discontinuation (ie, all-cause, due to adverse events, etc)                                                      |                                                                                                                                                                                                                                      |
| Study designs                      | RCTs (phase 2, 3, or 4), including follow-up studies of RCTs                                                                                                                             | Observational/real-world evidence studies; single-arm trials; phase 1 trials; SLRs/NMAs <sup>d</sup> ; pooled analyses of trials <sup>d</sup> ; narrative publications; nonsystematic reviews; case studies/case reports; editorials |
| Subgroups                          | Biologic naive; biologic exposed; severity of PsO <sup>a</sup>                                                                                                                           | Not applicable                                                                                                                                                                                                                       |
| Other limits                       | English-language articles/conference abstracts                                                                                                                                           | Journal articles and conference abstracts not available in English                                                                                                                                                                   |
|                                    | Time frame: no limit for 10- to 16-wk outcomes; 2000–present for studies reporting 24- to 28-wk or 44- to 60-wk outcomes; within the last 2 y for conference abstracts (all time points) | Studies published outside the time frame of interest                                                                                                                                                                                 |

<sup>a</sup>Mention of “moderate to severe” was a sufficient criterion for inclusion regardless of definition. However, if “moderate to severe” was not mentioned, a decision on inclusion was made with clear documentation based on any of the following criteria: Physician’s Global Assessment  $\geq 3$ , PASI  $\geq 10$ , body surface area  $\geq 10$ , and/or Dermatology Life Quality Index  $\geq 10$ .

<sup>b</sup>Studies/treatment arms evaluating only ustekinumab 45 mg were excluded from the SLR and NMA, as the ustekinumab 45 mg body weight requirement resulted in limited available data, comparability to the population for other treatments, and generalizability of the findings.

<sup>c</sup>All doses of systemic nonbiologic treatments were included, as doses are often modified or titrated.

<sup>d</sup>Systematic reviews, meta-analyses, and pooled analyses of RCTs were tagged separately during the screening phase, and the lists of included studies from each publication were reviewed to identify any additional relevant RCTs not otherwise captured by the database searches. These publications themselves were not included in the SLR unless unique data that are not published elsewhere were available.

*BID* twice daily; *BIW* twice weekly; *EOW* every other week; *IL* interleukin; *NMA* network meta-analysis; *PASI* Psoriasis Area and Severity Index; *PsA* psoriatic arthritis; *PsO* plaque psoriasis; *Q2/4/8/12W* every 2/4/8/12 weeks; *QW* weekly; *RCT* randomized controlled trial; *SLR* systematic literature review; TNF tumor necrosis factor.

**Table S4. Study and patient characteristics included in the NMA for all time points.**

| Trial (Phase)            | In Main Analysis, Y/N | Total Patients, No. | Primary End Point, Weeks | Severity Definition                                | Intervention(s) and Comparators                             | Age, Mean (SD), Years | Disease Duration, Years | Prior Biologic Therapy, % | Time Points Included in the NMA, Weeks |
|--------------------------|-----------------------|---------------------|--------------------------|----------------------------------------------------|-------------------------------------------------------------|-----------------------|-------------------------|---------------------------|----------------------------------------|
| ACCEPT [29] (3)          | Y                     | 903                 | 12                       | PASI $\geq$ 12, BSA $\geq$ 10%, PGA $\geq$ 3       | Etanercept 50 mg BIW                                        | 45.7 (13.4)           | 18.8                    | 11.8                      | 12                                     |
|                          |                       |                     |                          |                                                    | Ustekinumab 90 mg at wk 0 and 4, then Q12W                  | 44.8 (12.3)           | 18.7                    | 10.4                      |                                        |
| ALLURE [30] (3)          | N                     | 214                 | 12                       | PASI $\geq$ 12, BSA $\geq$ 10%, mIGA 2011 $\geq$ 3 | Secukinumab 300 mg QW to wk 4, then Q4W                     | 46.2 (13.9)           | 14.8                    | NR                        | 12, 28, 52                             |
|                          |                       |                     |                          |                                                    | Placebo                                                     | 41.4 (12.9)           | 17.7                    | NR                        |                                        |
| AIMutairi [31] 2021 (NR) | N                     | 313                 | 12                       | PASI $\geq$ 12, BSA $\geq$ 10%, PGA $\geq$ 3       | Ixekizumab 160 mg at wk 0 then 80 mg Q2W to wk 12, then Q4W | 42.0 (11.3)           | 18.1                    | 18.1                      | 16, 24, 52                             |
|                          |                       |                     |                          |                                                    | Secukinumab 300 mg QW to wk 4, then Q4W                     | 41.1 (13.7)           | 17.6                    | 16.5                      |                                        |
| AMAGINE-1 [32] (3)       | Y                     | 661                 | 12                       | PASI $\geq$ 12, BSA $\geq$ 10%, PGA $\geq$ 3       | Brodalumab 210 mg at wk 0, 1, and 2, then Q2W               | 46 (12)               | 20                      | 47                        | 12                                     |
|                          |                       |                     |                          |                                                    | Placebo                                                     | 47 (13)               | 21                      | 46                        |                                        |
| AMAGINE-2 [9] (3)        | Y                     | 1831                | 12                       | PASI $\geq$ 12, BSA $\geq$ 10%, PGA $\geq$ 3       | Ustekinumab 45 or 90 mg at wk 0 and 4, then Q12W            | 45 (13)               | 19                      | 28                        | 12, 24, 52                             |
|                          |                       |                     |                          |                                                    | Brodalumab 210 mg at wk 0, 1, and 2, then Q2W               | 45 (13)               | 19                      | 29                        |                                        |
|                          |                       |                     |                          |                                                    | Placebo                                                     | 44 (13)               | 18                      | 29                        |                                        |

|                               |   |      |    |                            |                                                  |             |      |                |            |
|-------------------------------|---|------|----|----------------------------|--------------------------------------------------|-------------|------|----------------|------------|
| AMAGINE-3 [9]<br>(3)          | Y | 1881 | 12 | PASI ≥12, BSA ≥10%, PGA ≥3 | Ustekinumab 45 or 90 mg at wk 0 and 4, then Q12W | 45 (13)     | 18   | 24             | 12, 24, 52 |
|                               |   |      |    |                            | Brodalumab 210 mg at wk 0, 1, and 2, then Q2W    | 45 (13)     | 18   | 25             |            |
|                               |   |      |    |                            | Placebo                                          | 44 (13)     | 18   | 24             |            |
| Asahina [33]<br>2010<br>(2/3) | N | 169  | 16 | PASI ≥12, BSA ≥10%         | Adalimumab 80 mg at wk 0, then 40 mg Q2W         | 44.2 (14.3) | 14   | 0 <sup>a</sup> | 16, 24     |
|                               |   |      |    |                            | Placebo                                          | 43.9 (10.8) | 15.5 | 0 <sup>a</sup> |            |
| BE ABLE 1 [34]<br>(2)         | N | 250  | 12 | PASI ≥12, BSA ≥10%, IGA ≥3 | Bimekizumab 320 mg Q4W                           | 42.6 (13.6) | 15.9 | 23.3           | 12         |
|                               |   |      |    |                            | Placebo                                          | 46.7 (12.3) | 15.0 | 23.8           |            |
| BE RADIANT [4]<br>(3b)        | Y | 743  | 16 | PASI ≥12, BSA ≥10%, IGA ≥3 | Bimekizumab 320 mg Q4W to wk 4, then Q8W         | 45.9 (14.2) | 18.4 | 33.5           | 16, 28, 48 |
|                               |   |      |    |                            | Secukinumab 300 mg QW to wk 4, then Q4W          | 44.0 (14.7) | 17.2 | 32.2           |            |
| BE READY [35]<br>(3)          | Y | 435  | 16 | PASI ≥12, BSA ≥10%, IGA ≥3 | Bimekizumab 320 mg Q4W                           | 44.5 (12.9) | 19.6 | 44             | 16         |
|                               |   |      |    |                            | Placebo                                          | 43.5 (13.1) | 19.1 | 43             |            |
| BE SURE (3) [24]              | Y | 478  | 16 | PASI ≥12, BSA ≥10%, IGA ≥3 | Bimekizumab 320 mg Q4W to wk 16, then Q8W        | 44 (13.5)   | 17.3 | 31.1           | 16, 24     |
|                               |   |      |    |                            | Adalimumab 80 mg at wk 0, then 40 mg Q2W         | 45.5 (14.3) | 16.2 | 33.3           |            |

|                         |   |     |    |                                  |                                                  |             |      |                                             |            |
|-------------------------|---|-----|----|----------------------------------|--------------------------------------------------|-------------|------|---------------------------------------------|------------|
| BE VIVID (3) [36]       | Y | 567 | 16 | PASI ≥12, BSA ≥10%, IGA ≥3       | Bimekizumab 320 mg Q4W                           | 45.2 (14.0) | 16.0 | 39                                          | 16, 28, 52 |
|                         |   |     |    |                                  | Ustekinumab 45 or 90 mg at wk 0 and 4, then Q12W | 46.0 (13.6) | 17.8 | 39                                          |            |
|                         |   |     |    |                                  | Placebo                                          | 49.7 (13.6) | 19.7 | 40                                          |            |
| Blauvelt, 2021 [37] (3) | Y | 157 | 16 | PASI ≥12, BSA ≥10%, sPGA ≥3      | Risankizumab 150 mg at wk 0, 4, and 16           | 49.3 (15.1) | 20.9 | 44.8                                        | 16         |
|                         |   |     |    |                                  | Placebo                                          | 48.8 (15.5) | 15.8 | 44.2                                        |            |
| BRIDGE [38] (3)         | N | 671 | 16 | PASI >10, BSA >10%, PGA ≥3       | Dimethyl fumarate up to 720 mg per wk            | 44 (15.2)   | NR   | IL-inhibitors: 2.5; TNF-alpha inhibitors: 0 | 16         |
|                         |   |     |    |                                  | Placebo                                          | 44 (14.3)   | NR   |                                             |            |
| Cai [39] 2017 (3)       | N | 425 | 12 | NR                               | Adalimumab 80 mg at wk 0, then 40 mg Q2W         | 43.1 (11.9) | 14.8 | 0 <sup>a</sup>                              | 12, 24     |
|                         |   |     |    |                                  | Placebo                                          | 43.8 (12.5) | 15.8 | 0 <sup>a</sup>                              |            |
| CAIN457A223 [40] (2)    | N | 36  | 12 | PASI ≥12, BSA ≥10%, mIGA 2011 ≥3 | Secukinumab 300 mg QW to wk 4, then Q4W          | 47.5 (14)   | NR   | NR                                          | 12         |
|                         |   |     |    |                                  | Placebo                                          | 50.3 (13.8) | NR   | NR                                          |            |
| CAIN457A2318 [41] (3b)  | N | 441 | 12 | PASI ≥12, BSA ≥10%, IGA ≥3       | Secukinumab 300 mg QW to wk 4, then Q4W          | 39.0 (11.6) | 15.0 | 14.9                                        | 12, 52     |
|                         |   |     |    |                                  | Placebo                                          | 38.7 (10.3) | 14.8 | 20.9                                        |            |
| Caproni 2009 [42] (NR)  | N | 60  | 12 | PASI ≥10, BSA ≥10%               | Etanercept 50 mg BIW                             | NR          | NR   | NR                                          | 12         |

|                          |   |     |    |                            | Acitretin 0.4 mg/kg/day                                      | NR          | NR   | NR             |                        |
|--------------------------|---|-----|----|----------------------------|--------------------------------------------------------------|-------------|------|----------------|------------------------|
| CARIMA [43] (3)          | N | 151 | 12 | PASI ≥10                   | Secukinumab 300 mg QW to wk 4, then Q4W                      | 44.2 (12.9) | 20.6 | 31.3           | 12, 52                 |
|                          |   |     |    |                            | Placebo                                                      | 43.7 (11.4) | 18.9 | 30.8           |                        |
| CHAMPION [44] (3)        | Y | 271 | 16 | PASI ≥10, BSA ≥10%         | Adalimumab 80 mg at wk 0,,,,,,,,,,,,, then 40 mg Q2W         | 42.9 (12.6) | 17.9 | 0 <sup>a</sup> | 16                     |
|                          |   |     |    |                            | Placebo                                                      | 40.7 (11.4) | 18.8 | 0 <sup>a</sup> |                        |
| Chaudhari [45] 2001 (NR) | N | 33  | 10 | BSA ≥5%                    | Infliximab 5 mg/kg at wk 0, 2, and 6                         | 51 (14)     | NR   | 0 <sup>a</sup> | 10                     |
|                          |   |     |    |                            | Placebo                                                      | 45 (12)     | NR   | 0 <sup>a</sup> |                        |
| CIMPACT [46] (3)         | N | 559 | 12 | PASI ≥12, BSA ≥10%, PGA ≥3 | Certolizumab pegol 400 mg at wk 0, 2, and 4 then 200 mg Q2W  | 46.7 (13.5) | 19.5 | 26.7           | 16 (12 for etanercept) |
|                          |   |     |    |                            | Certolizumab pegol 400 mg Q2W                                | 45.4 (12.4) | 17.8 | 28.7           |                        |
|                          |   |     |    |                            | Etanercept 50 mg BIW                                         | 44.6 (14.1) | 17.4 | 30.0           |                        |
|                          |   |     |    |                            | Placebo                                                      | 46.5 (12.5) | 18.9 | 19.3           |                        |
| CIMPASI-1 [47] (3)       | N | 234 | 16 | PASI ≥12, BSA ≥10%, PGA ≥3 | Certolizumab pegol 400 mg at wk 0, 2, and 4, then 200 mg Q2W | 44.5 (13.1) | 16.6 | 31.6           | 16                     |
|                          |   |     |    |                            | Certolizumab pegol 400 mg Q2W                                | 43.6 (12.1) | 18.4 | 33.0           |                        |
|                          |   |     |    |                            | Placebo                                                      | 47.9 (12.8) | 18.5 | 29.4           |                        |
| CIMPASI-2 [47] (3)       | N | 227 | 16 | PASI ≥12, BSA ≥10%, PGA ≥3 | Certolizumab pegol 400 mg at wk 0, 2, and 4, then 200 mg Q2W | 46.7 (13.3) | 18.8 | 35.2           | 16                     |
|                          |   |     |    |                            | Certolizumab pegol 400 mg Q2W                                | 46.4 (13.5) | 18.6 | 34.5           |                        |
|                          |   |     |    |                            | Placebo                                                      | 43.3 (14.5) | 15.4 | 28.6           |                        |



|                                  |   |      |    |                                  |                                                  |               |      |      |            |
|----------------------------------|---|------|----|----------------------------------|--------------------------------------------------|---------------|------|------|------------|
| CLARITY [48] (3b)                | N | 1102 | 12 | PASI ≥12, BSA ≥10%, mIGA 2011 ≥3 | Secukinumab 300 mg QW to wk 4, then Q4W          | 45.4 (14.1)   | 16.8 | 20.0 | 16, 28, 52 |
|                                  |   |      |    |                                  | Ustekinumab 45 or 90 mg at wk 0 and 4, then Q12W | 45.3 (14.2)   | 17.3 | 23.6 |            |
| CLEAR [25, 26] (3)               | Y | 676  | 16 | PASI ≥12, BSA ≥10%, mIGA ≥3      | Secukinumab 300 mg QW to wk 4, then Q4W          | 45.2 (14.0)   | 19.6 | 14.2 | 16, 24, 52 |
|                                  |   |      |    |                                  | Ustekinumab 45 or 90 ng at wk 0 and 4, then Q12W | 44.6 (13.7)   | 16.1 | 13.0 |            |
| ECLIPSE [27] (3)                 | Y | 1048 | 12 | PASI ≥12, BSA ≥10%, IGA ≥3       | Guselkumab 100 mg at wk 0, 4, and 12, then Q8W   | 46.3 (13.7)   | 18.5 | 29   | 12, 24, 48 |
|                                  |   |      |    |                                  | Secukinumab 300 mg QW to wk 4, then Q4W          | 45.3 (13.6)   | 18.3 | 29   |            |
| ERASURE [26] (3)                 | Y | 738  | 12 | PASI ≥12, BSA ≥10%, mIGA ≥3      | Secukinumab 300 mg QW to wk 4, then Q4W          | 44.9 (13.5)   | 17.4 | 28.6 | 16, 24     |
|                                  |   |      |    |                                  | Secukinumab 150 mg QW to wk 4, then Q4W          | 44.9 (13.3)   | 17.5 | 29.8 |            |
|                                  |   |      |    |                                  | Placebo                                          | 45.4 (12.6)   | 17.3 | 29.4 |            |
| ESTEEM 1 [49] (3)                | Y | 844  | 16 | PASI ≥12, BSA ≥10%, sPGA ≥3      | Apremilast 30 mg BID                             | 45.8 (13.1)   | 19.8 | 28.8 | 16, 24     |
|                                  |   |      |    |                                  | Placebo                                          | 46.5 (12.7)   | 18.7 | 28.4 |            |
| ESTEEM 2 [50] (3)                | Y | 411  | 16 | PASI ≥12, BSA ≥10%, sPGA ≥3      | Apremilast 30 mg BID                             | 45.3 (13.1)   | 17.9 | 33.6 | 16, 24     |
|                                  |   |      |    |                                  | Placebo                                          | 45.7 (13.4)   | 18.7 | 32.1 |            |
| Etanercept Study Group [51] (NR) | Y | 583  | 12 | PASI ≥10, BSA ≥10%               | Etanercept 50 mg BIW to wk 12, then 25 mg BIW    | 44.5 (median) | 18.1 | NR   | 12, 24     |

|                            |   |      |    |                                        |                                                      |                  |      |                |            |
|----------------------------|---|------|----|----------------------------------------|------------------------------------------------------|------------------|------|----------------|------------|
|                            |   |      |    |                                        | Etanercept 25 mg BIW                                 | 46.0<br>(median) | 21.5 | NR             |            |
|                            |   |      |    |                                        | Placebo                                              | 44.0<br>(median) | 17.5 | NR             |            |
| EXPRESS [52]<br>(3)        | Y | 378  | 10 | PASI ≥12, BSA<br>≥10%                  | Infliximab 5 mg/kg at<br>wk 0, 2, and 6, then<br>Q8W | 42.6 (11.7)      | 19.1 | 0 <sup>a</sup> | 10, 24, 50 |
|                            |   |      |    |                                        | Placebo                                              | 43.8 (12.6)      | 17.3 | 0 <sup>a</sup> |            |
| EXPRESS II [53]<br>(3)     | Y | 835  | 10 | PASI ≥12, BSA<br>≥10%                  | Infliximab 5 mg/kg at<br>wk 0, 2, and 6, then<br>Q8W | 44.5 (13.0)      | 19.1 | 14.3           | 10, 26, 50 |
|                            |   |      |    |                                        | Placebo                                              | 44.4 (12.5)      | 17.8 | 13.0           |            |
| FEATURE [54,<br>55] (3)    | Y | 177  | 12 | PASI ≥12, BSA<br>≥10%, mIGA<br>2011 ≥3 | Secukinumab 300 mg<br>QW to wk 4, then<br>Q4W        | 45.1 (12.6)      | 18.0 | 39.0           | 12, 24, 52 |
|                            |   |      |    |                                        | Secukinumab 150 mg<br>QW to wk 4, then<br>Q4W        | 46.0 (15.1)      | 20.4 | 47.5           |            |
|                            |   |      |    |                                        | Placebo                                              | 46.5 (14.1)      | 20.2 | 44.1           |            |
| FIXTURE [26] (3)           | Y | 1306 | 12 | PASI ≥12, BSA<br>≥10%, mIGA ≥3         | Secukinumab 300 mg<br>QW to wk 4, then<br>Q4W        | 44.5 (13.2)      | 15.8 | 11.6           | 12, 24, 52 |
|                            |   |      |    |                                        | Secukinumab 150 mg<br>QW to wk 4, then<br>Q4W        | 45.4 (12.9)      | 17.3 | 13.8           |            |
|                            |   |      |    |                                        | Etanercept 50 mg BIW<br>to wk 12, then QW            | 43.8 (13.0)      | 16.4 | 13.8           |            |
|                            |   |      |    |                                        | Placebo                                              | 44.1 (12.6)      | 16.6 | 10.7           |            |
| Flystrom 2008<br>[56] (NR) | N | 68   | 12 | NR                                     | Methotrexate 7.5–15<br>mg QW                         | 48               | NR   | NR             | 12         |
|                            |   |      |    |                                        | Cyclosporine 3–5<br>mg/kg/day                        | 45               | NR   | NR             |            |

|                            |   |     |    |                             |                                              |               |      |                |            |
|----------------------------|---|-----|----|-----------------------------|----------------------------------------------|---------------|------|----------------|------------|
| Gisondi 2008 [57] (NR)     | N | 60  | 24 | NR                          | Etanercept 25 mg BIW                         | 55.3          | 23.5 | 0 <sup>a</sup> | 12, 24     |
|                            |   |     |    |                             | Acitretin 0.4 mg/kg/day                      | 55.0          | 18.8 | 0 <sup>a</sup> |            |
| Goldminz 2015 [58] (4)     | N | 30  | 16 | PGA ≥3                      | Adalimumab 80 mg at wk 0, then 40 mg Q2W     | 50.5          | 17.3 | 0 <sup>a</sup> | 12         |
|                            |   |     |    |                             | Methotrexate 7.5–25 mg QW                    | 50.3          | 21.5 | 0 <sup>a</sup> |            |
| Gottlieb, 2003 [59] (2)    | N | 112 | 12 | BSA ≥10%                    | Etanercept 25 mg BIW                         | 48.2          | 23   | NR             | 12, 24     |
|                            |   |     |    |                             | Placebo                                      | 46.5          | 20   | NR             |            |
| Heydendael, 2003 [60] (NR) | N | 88  | 16 | PASI ≥8                     | Methotrexate 15–22.5 mg QW                   | 41.6 (13.0)   | NR   | NR             | 16         |
|                            |   |     |    |                             | Cyclosporine 3–5 mg/kg/day                   | 38.3 (12.4)   | NR   | NR             |            |
| Igarashi [61] 2012 (2/3)   | N | 158 | 12 | PASI ≥12, BSA ≥10%          | Ustekinumab 90 mg at wk 0 and 4, then Q12W   | 44.0 (median) | 17.3 | 0              | 12, 24, 52 |
|                            |   |     |    |                             | Placebo                                      | 49.0 (median) | 16.0 | 0              |            |
| IMMerge [28] (3)           | Y | 327 | 16 | PASI ≥12, BSA ≥10%, sPGA ≥3 | Risankizumab 150 mg at wk 0 and 4, then Q12W | 47.3 (13.4)   | 18.6 | 37.8           | 16, 24, 52 |
|                            |   |     |    |                             | Secukinumab 300 mg QW to wk 4, then Q4W      | 46.8 (14.9)   | 17.4 | 35.6           |            |
| IMMhance [62] (3)          | Y | 507 | 16 | PASI ≥12, BSA ≥10%, sPGA ≥3 | Risankizumab 150 mg at wk 0 and 4, then Q12W | 51 (median)   | NR   | 56.5           | 16, 24     |
|                            |   |     |    |                             | Placebo                                      | 48 (median)   | NR   | 51.0           |            |

|                        |   |     |    |                                                    |                                                         |                |      |                |            |
|------------------------|---|-----|----|----------------------------------------------------|---------------------------------------------------------|----------------|------|----------------|------------|
| IMMvent [5] (3)        | Y | 605 | 16 | PASI $\geq$ 12, BSA $\geq$ 10%, sPGA $\geq$ 3      | Risankizumab 150 mg at wk 0 and 4, then Q12W            | 45.3 (13.8)    | NR   | 39             | 16         |
|                        |   |     |    |                                                    | Adalimumab 40 mg at wk 0, then 40 mg Q2W                | 47.0 (13.1)    | NR   | 37             |            |
| IXORA-R (4) [8]        | N |     | 12 | PASI $\geq$ 12, BSA $\geq$ 10%, sPGA $\geq$ 3      | Ixekizumab 160 mg at wk 0, 80 mg Q2W to wk 12, then Q4W | 49 (13.9)      | 17.5 | 26             | 12, 24     |
|                        |   |     |    |                                                    | Guselkumab 100 mg at wk 0 and 4, then Q8W               | 49 (14.9)      | 16.3 | 26             |            |
| IXORA-S [11] (3b)      | Y | 302 | 12 | PASI $\geq$ 10                                     | Ustekinumab 45 or 90 mg at wk 0 and 4, then Q12W        | 44.0 (13.3)    | 18.2 | 15.1           | 12, 24, 52 |
|                        |   |     |    |                                                    | Ixekizumab 160 mg at wk 0, 80 mg Q2W to wk 12, then Q4W | 42.7 (12.7)    | 18.0 | 13.2           |            |
| JUNCTURE [63] (3)      | N | 182 | 12 | PASI $\geq$ 12, BSA $\geq$ 10%, mIGA 2011 $\geq$ 3 | Secukinumab 300 mg QW to wk 4, then Q4W                 | 46.6 (14.2)    | 21.0 | 25.0           | 12, 24, 52 |
|                        |   |     |    |                                                    | Secukinumab 150 mg QW to wk 4, then Q4W                 | 43.9 (14.4)    | 20.6 | 24.6           |            |
|                        |   |     |    |                                                    | Placebo                                                 | 43.7 (12.7)    | 19.9 | 21.3           |            |
| Lee 2016 [64] (NR)     | N | 60  | 24 | PASI $\geq$ 10, BSA $\geq$ 10%                     | Etanercept 50 mg BIW to wk 12, then 25 mg BIW           | 38.6 (9.5)     | NR   | NR             | 24         |
|                        |   |     |    |                                                    | Acitretin 10 mg BID                                     | 42.4 (12.0)    | NR   | NR             |            |
| Leonardi [65] 2003 (3) | N | 672 | 12 | PASI $\geq$ 10, BSA $\geq$ 10%                     | Etanercept 25 mg QW                                     | 44.4 (SE, 0.9) | 19.3 | 0 <sup>a</sup> | 12, 24     |
|                        |   |     |    |                                                    | Etanercept 25 mg BIW                                    | 45.4 (SE, 1.0) | 18.5 | 0 <sup>a</sup> |            |

|                        |   |     |    |                             |                                               |                |      |                |            |
|------------------------|---|-----|----|-----------------------------|-----------------------------------------------|----------------|------|----------------|------------|
|                        |   |     |    |                             | Etanercept 50 mg BIW                          | 44.8 (SE, 0.8) | 18.6 | 0 <sup>a</sup> |            |
|                        |   |     |    |                             | Placebo                                       | 45.6 (SE, 1.0) | 18.4 | 0 <sup>a</sup> |            |
| LIBERATE [6] (3)       | Y | 250 | 16 | PASI ≥12, BSA ≥10%, sPGA ≥3 | Etanercept 50 mg QW                           | 47.0 (14.1)    | 18.1 | 0 <sup>a</sup> | 16, 52     |
|                        |   |     |    |                             | Apremilast 30 mg BID                          | 46.0 (13.6)    | 19.7 | 0 <sup>a</sup> |            |
|                        |   |     |    |                             | Placebo                                       | 43.4 (14.9)    | 16.6 | 0 <sup>a</sup> |            |
| M02-528 [66] (2)       | N | 147 | 12 | BSA ≥5%, PsO ≥1 y           | Adalimumab 80 mg at wk 0, then 40 mg Q2W      | 46             | 21   | 0 <sup>a</sup> | 12, 24, 52 |
|                        |   |     |    |                             | Placebo                                       | 43             | 19   | 0 <sup>a</sup> |            |
| M10-114 [67] (3)       | Y | 347 | 12 | PASI ≥12, BSA ≥10%, PGA ≥3  | Etanercept 50 mg BIW                          | 43.1 (12.5)    | 17.0 | 14.2           | 12         |
|                        |   |     |    |                             | Placebo                                       | 44.0 (13.6)    | 19.1 | 14.7           |            |
| M10-315 [68] (3)       | Y | 350 | 12 | PASI ≥12, BSA ≥10%, PGA ≥3  | Etanercept 50 mg BIW                          | 45.2 (14.8)    | 15.2 | 7.9            | 12         |
|                        |   |     |    |                             | Cyclosporin A 2.5 mg/kg/day                   | NR             | NR   | NR             |            |
|                        |   |     |    |                             | Placebo                                       | NR             | NR   | NR             |            |
| METOP [104] (3)        | Y | 120 | 16 | PASI ≥10, BSA ≥10%          | Methotrexate 17.5–22.5 mg QW                  | 45.9 (12.9)    | 20.7 | 5              | 16, 24, 52 |
|                        |   |     |    |                             | Placebo                                       | 44.4 (10.8)    | 14.3 | 3              |            |
| Nakagawa [70] 2016 (2) | N | 151 | 12 | PASI ≥12, BSA ≥10%          | Brodalumab 210 mg at wk 0, 1, and 2, then Q2W | 46.4 (11.8)    | 15.0 | 13.5           | 12         |
|                        |   |     |    |                             | Placebo                                       | 46.6 (10.8)    | 16.9 | 7.9            |            |
| Noor 2017 [71] NR)     | N | 142 | 24 | BSA ≥20%                    | Methotrexate 25 mg QW                         | NR             | NR   | NR             | 24         |

|                            |   |      |    |                            |                                               |             |      |                 |        |
|----------------------------|---|------|----|----------------------------|-----------------------------------------------|-------------|------|-----------------|--------|
|                            |   |      |    |                            | Acitretin 0.4 mg/kg/day                       | NR          | NR   | NR              |        |
| Ohtsuki [72] 2017 (2b)     | N | 254  | 16 | PASI ≥12, BSA ≥10%         | Apremilast 30 mg BID                          | 51.7 (12.7) | 13.9 | 2.4             | 16, 24 |
|                            |   |      |    |                            | Placebo                                       | 48.3 (12.0) | 12.4 | 4.8             |        |
| Ohtsuki [73] 2018 (3)      | N | 192  | 16 | PASI ≥12, BSA ≥10%, IGA ≥3 | Guselkumab 100 mg at wk 0 and 4, then Q8W     | 47.8 (11.1) | 14.4 | 17.5            | 16, 24 |
|                            |   |      |    |                            | Placebo                                       | 48.3 (10.6) | 13.7 | 15.6            |        |
| OPT Compare Study [74] (3) | Y | 1106 | 12 | PASI ≥12, BSA ≥10%, PGA ≥3 | Etanercept 50 mg BIW                          | 42.0        | 18.0 | 11              | 12     |
|                            |   |      |    |                            | Placebo                                       | 46.0        | 17.0 | 11              |        |
| ORION [75] (3)             | Y | 78   | 16 | PASI ≥12, BSA ≥10% IGA ≥3  | Guselkumab 100 mg at wk 0 and 4, then Q8W     | 46.2 (12.9) | 19.1 | NR              | 16, 24 |
|                            |   |      |    |                            | Placebo                                       | 45.4 (12.8) | 17.4 | NR              |        |
| P05495 [76] (2b)           | N | 355  | 16 | PASI ≥12, BSA ≥10%, PGA ≥3 | Tildrakizumab 100 mg at wk 0 and 4, then Q12W | 45.5 (12.8) | NR   | 26              | 16     |
|                            |   |      |    |                            | Tildrakizumab 200 mg at wk 0 and 4, then Q12W | 43.2 (12.6) | NR   | 26              |        |
|                            |   |      |    |                            | Placebo                                       | 45.9 (11.7) | NR   | 28              |        |
| Papp 2012 [77] 2)          | N | 198  | 12 | PASI ≥12, BSA ≥10%         | Brodalumab 210 mg at wk 0, 1, and 2, then Q2W | 42.1 (12.2) | 17.1 | Etanercept: 10  | 12     |
|                            |   |      |    |                            |                                               |             |      | Adalimumab : 18 |        |
|                            |   |      |    |                            |                                               |             |      | Ustekinumab: 15 |        |
|                            |   |      |    |                            |                                               |             |      | Placebo         |        |
|                            |   |      |    |                            | Adalimumab : 11                               |             |      |                 |        |

|                      |   |      |    |                                                                   |                                                |             |      |                 |            |
|----------------------|---|------|----|-------------------------------------------------------------------|------------------------------------------------|-------------|------|-----------------|------------|
|                      |   |      |    |                                                                   |                                                |             |      | Ustekinumab: 13 |            |
| Papp 2012 [78] (2)   | N | 352  | 16 | PASI ≥12, BSA ≥10%                                                | Apremilast 30 mg BID                           | 44.1 (14.7) | 19.2 | NR              | 16, 24     |
|                      |   |      |    |                                                                   | Placebo                                        | 44.1 (13.7) | 19.6 | NR              |            |
| PHOENIX 1 [79] (3)   | Y | 766  | 12 | PASI ≥12, BSA ≥10%                                                | Ustekinumab 90 mg at wk 0 and 4, then Q12W     | 46.2 (11.3) | 19.6 | 50.8            | 12, 28     |
|                      |   |      |    |                                                                   | Placebo                                        | 44.8 (11.3) | 20.4 | 50.2            |            |
| PHOENIX 2 [80] (3)   | Y | 1230 | 12 | PASI ≥12, BSA ≥10%                                                | Ustekinumab 90 mg at wk 0 and 4, then Q12W     | 46.6 (12.1) | 20.3 | 36.5            | 12, 28     |
|                      |   |      |    |                                                                   | Placebo                                        | 47.0 (12.5) | 20.8 | 38.8            |            |
| PIECE [81] (NR)      | N | 48   | 24 | PASI ≥10 and/or BSA ≥10, and/or PASI ≥8 plus Skindex-29 score ≥35 | Etanercept 50 mg BIW                           | 42.4 (13.2) | 17.9 | Efalizumab: 4   | 12         |
|                      |   |      |    |                                                                   |                                                |             |      | Etanercept: 9   |            |
|                      |   |      |    |                                                                   |                                                |             |      | Adalimumab : 9  |            |
|                      |   |      |    |                                                                   | Infliximab 5 mg/kg at wk 0, 2, and 6, then Q8W | 45.9 (13.9) | 21.5 | Efalizumab: 0   |            |
|                      |   |      |    |                                                                   |                                                |             |      | Etanercept: 8   |            |
|                      |   |      |    |                                                                   |                                                |             |      | Adalimumab : 4  |            |
| POETYK PSO-1 [1] (3) | Y | 666  | 16 | PASI ≥12, BSA ≥10%, sPGA ≥3                                       | Deucravacitinib 6 mg OD                        | 45.9 (13.7) | 17.1 | 39.2            | 16, 24, 52 |
|                      |   |      |    |                                                                   | Apremilast 30 mg BID                           | 44.7 (12.1) | 17.7 | 39.3            | 16, 24     |

|                      |   |      |    |                                               |                                                            |             |      |                |            |
|----------------------|---|------|----|-----------------------------------------------|------------------------------------------------------------|-------------|------|----------------|------------|
|                      |   |      |    |                                               | Placebo                                                    | 47.9 (14.0) | 17.3 | 38.0           | 16         |
| POETYK PSO-2 [2] (3) | Y | 1020 | 16 | PASI $\geq$ 12, BSA $\geq$ 10%, sPGA $\geq$ 3 | Deucravacitinib 6 mg OD                                    | 46.9 (13.4) | 19.6 | 32.3           | 16, 24, 52 |
|                      |   |      |    |                                               | Apremilast 30 mg BID                                       | 46.4 (13.3) | 18.9 | 31.1           | 16, 24     |
|                      |   |      |    |                                               | Placebo                                                    | 47.3 (13.6) | 19.9 | 32.5           |            |
| Reich, 2012 [82] (2) | N | 176  | 12 | PASI $\geq$ 12, BSA $\geq$ 10%                | Certolizumab 400 mg Q2W                                    | 43.6 (12.4) | 19.6 | 24             | 12         |
|                      |   |      |    |                                               | Placebo                                                    | 43.3 (12.8) | 19.7 | 24             |            |
| Reich 2020 [83] (3b) | Y | 162  | 16 | NR                                            | Ixekizumab 160 mg at wk 0, 80 mg Q2W to wk 12 and then Q4W | 44.3 (13.8) | 13.9 | 0 <sup>a</sup> | 16, 24     |
|                      |   |      |    |                                               | Methotrexate 7.5–25 mg QW                                  | 38.7 (12.9) | 12.9 | 0 <sup>a</sup> |            |
| RESTORE1 [84] (3b)   | Y | 868  | 16 | PASI $\geq$ 12, BSA $\geq$ 10%                | Infliximab 5 mg/kg at wk 0, 2, and 6, then Q8W             | 44.1        | 18.8 | 8.3            | 16         |
|                      |   |      |    |                                               | Methotrexate 15 mg QW                                      | 41.9        | 17.0 | 8.4            |            |
| reSURFACE 1 [7] (3)  | Y | 772  | 12 | PASI $\geq$ 12, BSA $\geq$ 10%, PGA $\geq$ 3  | Tildrakizumab 200 mg at wk 0 and 4, then Q12W              | 46.9 (13.2) | NR   | 23             | 12, 28     |
|                      |   |      |    |                                               | Tildrakizumab 100 mg at wk 0 and 4, then Q12W              | 46.4 (13.3) | NR   | 23             |            |
|                      |   |      |    |                                               | Placebo                                                    | 47.9 (13.5) | NR   | 23             |            |
| reSURFACE 2 [7] (3)  | Y | 1090 | 12 | PASI $\geq$ 12, BSA $\geq$ 10%, PGA $\geq$ 3  | Tildrakizumab 200 mg at wk 0 and 4, then Q12W              | 44.6 (13.6) | NR   | 12             | 12, 28     |
|                      |   |      |    |                                               | Tildrakizumab 100 mg at wk 0 and 4, then Q12W              | 44.6 (13.6) | NR   | 13             |            |
|                      |   |      |    |                                               | Etanercept 50 mg BIW to wk 12, then Q12W                   | 45.8 (14.0) | NR   | 12             |            |
|                      |   |      |    |                                               | Placebo                                                    | 46.4 (12.2) | NR   | 13             |            |



|                      |   |      |    |                             |                                                  |             |      |                |            |
|----------------------|---|------|----|-----------------------------|--------------------------------------------------|-------------|------|----------------|------------|
| REVEAL [85] (3)      | Y | 1212 | 16 | PASI ≥12, BSA ≥10%, PGA ≥3  | Adalimumab 80 mg at wk 0 then 40 mg Q2W          | 44.1 (13.2) | 18.1 | 11.9           | 16         |
|                      |   |      |    |                             | Placebo                                          | 45.4 (13.4) | 18.4 | 13.3           |            |
| Rui 2021 [86] (3)    | N | 438  | 12 | NR                          | Infliximab 160 mg at wk 0, then 80 mg Q2W        | NR          | NR   | NR             | 12         |
|                      |   |      |    |                             | Placebo                                          | NR          | NR   | NR             |            |
| Seo [87] 2021 (3)    | N | 62   | 12 | PASI ≥12, BSA ≥10%, sPGA ≥3 | Brodalumab 210 mg at wk 0 and 1, then Q2W        | 43.5 (14.3) | 10.9 | 10.0           | 12, 24, 52 |
|                      |   |      |    |                             | Placebo                                          | 43.7 (15.8) | 13.6 | 36.4           |            |
| SPIRIT [88] (NR)     | Y | 249  | 10 | PASI ≥12, BSA ≥10%          | Infliximab 5 mg/kg at wk 0, 2, and 6             | 44 (median) | 16   | 33.3           | 10         |
|                      |   |      |    |                             | Placebo                                          | 45 (median) | 16   | 31.4           |            |
| SustalMM [89] (2/3)  | N | 171  | 16 | PASI ≥12, BSA ≥10%, sPGA ≥3 | Risankizumab 150 mg at wk 0 and 4, then Q12W     | 53.3 (11.9) | NR   | 29             | 16, 28, 52 |
|                      |   |      |    |                             | Placebo                                          | 50.9 (11.2) | NR   | 24             |            |
| Tyring [90] 2006 (3) | N | 620  | 12 | PASI ≥10, BSA ≥10%          | Etanercept 50 mg BIW                             | 45.8 (12.8) | 20.1 | 0 <sup>a</sup> | 12, 24, 48 |
|                      |   |      |    |                             | Placebo                                          | 45.6 (12.1) | 19.7 | 0 <sup>a</sup> |            |
| UltiMMa-1 [3] (3)    | Y | 506  | 12 | PASI ≥12, BSA ≥10%, sPGA ≥3 | Risankizumab 150 mg at wk 0 and 4, then Q12W     | 48.3 (13.4) | NR   | 34             | 16, 52     |
|                      |   |      |    |                             | Ustekinumab 45 or 90 mg at wk 0 and 4, then Q12W | 46.5 (13.4) | NR   | 30             |            |
|                      |   |      |    |                             | Placebo                                          | 49.3 (13.6) | NR   | 39             |            |
| UltiMMa-2 [3] (3)    | Y | 491  | 12 | PASI ≥12, BSA ≥10%, sPGA ≥3 | Risankizumab 150 mg at wk 0 and 4, then Q12W     | 46.2 (13.7) | NR   | 40             | 16, 52     |
|                      |   |      |    |                             | Ustekinumab 45 or 90 mg at wk 0 and 4, then Q12W | 48.6 (14.8) | NR   | 43             |            |
|                      |   |      |    |                             | Placebo                                          | 46.3 (13.3) | NR   | 43             |            |

|                                    |   |      |    |                                        |                                                                    |             |      |                  |            |
|------------------------------------|---|------|----|----------------------------------------|--------------------------------------------------------------------|-------------|------|------------------|------------|
| Umezawa [91]<br>021 (2/3)          | N | 127  | 16 | PASI ≥12, BSA<br>≥10%, PGA ≥3          | Certolizumab pegol<br>400 mg Q2W                                   | 52.4 (11.6) | 13.2 | Anti-TNF:<br>5.7 | 16         |
|                                    |   |      |    |                                        | Certolizumab pegol<br>400 mg at wk 0, 2, and<br>4, then 200 mg Q2W | 48.4 (13.5) | 12.7 | Anti-TNF:<br>6.3 |            |
|                                    |   |      |    |                                        | Placebo                                                            | 47.9 (11.4) | 12.7 | Anti-TNF:<br>3.8 |            |
| UNCOVER-1 [92]<br>(3)              | Y | 1296 | 12 | PASI ≥12, BSA<br>≥10%, sPGA ≥3         | Ixekizumab 160 mg at<br>wk 0, then 80 mg<br>Q2W                    | 45 (12)     | 20   | 40               | 12         |
|                                    |   |      |    |                                        | Placebo                                                            | 46 (13)     | 20   | 42               |            |
| UNCOVER-2 [93]<br>(3)              | Y | 1224 | 12 | PASI ≥12, BSA<br>≥10%, sPGA ≥3         | Ixekizumab 160 mg at<br>wk 0, then 80 mg<br>Q2W                    | 45 (13)     | 18   | 24               | 12         |
|                                    |   |      |    |                                        | Etanercept 50 mg BIW                                               | 45 (13)     | 19   | 21               |            |
|                                    |   |      |    |                                        | Placebo                                                            | 45 (12)     | 19   | 26               |            |
| UNCOVER-3 [93]<br>(3)              | Y | 1346 | 12 | PASI ≥12, BSA<br>≥10%, sPGA ≥3         | Ixekizumab 160 mg at<br>wk 0, then 80 mg<br>Q2W                    | 46 (13)     | 18   | 15               | 12, 24, 60 |
|                                    |   |      |    |                                        | Etanercept 50 mg BIW                                               | 46 (14)     | 18   | 16               |            |
|                                    |   |      |    |                                        | Placebo                                                            | 46 (12)     | 18   | 17               |            |
| UNVEIL [94, 95]<br>(4)             | N | 221  | 16 | BSA 5%–10%,<br>sPGA 3                  | Apremilast 30 mg BID                                               | 48.6 (15.4) | 17.5 | 0 <sup>a</sup>   | 16, 52     |
|                                    |   |      |    |                                        | Placebo                                                            | 51.1 (13.7) | 13.9 | 0 <sup>a</sup>   |            |
| Van de Kerkhof<br>[96] 2008<br>(3) | N | 142  | 12 | PASI ≥10, BSA<br>≥10%                  | Etanercept 50 mg QW                                                | 45.9 (12.8) | 19.3 | 0 <sup>a</sup>   | 12, 24     |
|                                    |   |      |    |                                        | Placebo                                                            | 43.6 (12.6) | 17.3 | 0 <sup>a</sup>   |            |
| VIP [97] (4)                       | N | 97   | 12 | PASI ≥12, BSA<br>≥10%                  | Adalimumab 80 mg at<br>wk 0, then 40 mg<br>Q2W                     | 44.2 (14.0) | 11   | 32.3             | 12         |
|                                    |   |      |    |                                        | Placebo                                                            | 44.3 (14.5) | 20   | 35.5             |            |
| VIP-S [98] (4)                     | N | 91   | 12 | PASI ≥12, BSA<br>≥10%, mIGA<br>2011 ≥3 | Secukinumab 300 mg<br>QW to wk 4, then<br>Q4W                      | 47.9 (12.7) | 16.3 | 43.5             | 12         |
|                                    |   |      |    |                                        | Placebo                                                            | 47.0 (14.7) | 15.4 | 35.6             |            |

|                     |   |     |    |                            |                                                       |             |      |      |            |
|---------------------|---|-----|----|----------------------------|-------------------------------------------------------|-------------|------|------|------------|
| VIP-U [99] (4)      | N | 43  | 12 | PASI ≥12, BSA ≥10%         | Ustekinumab 45 or 90 mg at wk 0, 4, and 12, then Q12W | 39.5 (13.6) | 16.5 | 45.5 | 12         |
|                     |   |     |    |                            | Placebo                                               | 45.3 (12.8) | 20.3 | 42.9 |            |
| VOYAGE 1 [100] (3)  | Y | 837 | 16 | PASI ≥12, BSA ≥10%, IGA ≥3 | Guselkumab 100 mg at wk 0 and 4, then Q8W             | 43.9 (12.7) | 17.9 | 21.6 | 16, 24, 48 |
|                     |   |     |    |                            | Adalimumab 80 mg at wk 0, then 40 mg Q2W              | 42.9 (12.6) | 17.0 | 21.0 |            |
|                     |   |     |    |                            | Placebo                                               | 44.9 (12.9) | 17.6 | 19.5 |            |
| VOYAGE 2 [101] (3)  | Y | 992 | 16 | PASI ≥12, BSA ≥10%, IGA ≥3 | Guselkumab 100 mg at wk 0 and 4, then Q8W             | 43.7 (12.2) | 17.9 | 20.4 | 16, 24, 48 |
|                     |   |     |    |                            | Adalimumab 80 mg at wk 0, then 40 mg Q2W              | 43.2 (11.9) | 17.6 | 19.8 |            |
|                     |   |     |    |                            | Placebo                                               | 43.3 (12.4) | 17.9 | 21.8 |            |
| X-PLORE [102] (2)   | N | 293 | 16 | PASI ≥12, BSA ≥10%, PGA ≥3 | Adalimumab 80 mg at wk 0, then 40 mg Q2W              | 50.0        | 19.3 | 60   | 16, 24     |
|                     |   |     |    |                            | Placebo                                               | 46.5        | 18.0 | 36   |            |
| Yang [103] 2012 (3) | N | 84  | 10 | PASI ≥12, BSA ≥10%         | Infliximab 5 mg/kg at wk 0, 2, and 6, then Q8W        | 39.4 (12.3) | 16.0 | NR   | 10, 26     |
|                     |   |     |    |                            | Placebo                                               | 40.1 (11.1) | 16.0 | NR   |            |

<sup>a</sup>Prior biologic treatment was not allowed in this study.

*BIW* twice weekly; *BSA* body surface area; *IGA* Investigator's Global Assessment; *mIGA* IGA modified version; *NMA* network meta-analysis; *NR* not reported; *PASI* Psoriasis Area Severity Index; *PGA* Patient's Global Assessment; *Q2/4/8/12W* every 2/4/8/12 weeks; *QW* once weekly; *SD* standard deviation; *SE* standard error; *sPGA* static PGA; *TNF* tumor necrosis factor

**Table S5. Main short-term (10–16 weeks) PASI 50, 75, 90, and 100 response probabilities, by treatment.**

| <b>Treatment</b>              | <b>Treatment Class</b> | <b>PASI-50,<br/>median, %<br/>(95% CrI)</b> | <b>PASI-75,<br/>median, %<br/>(95% CrI)</b> | <b>PASI-90,<br/>median, %<br/>(95% CrI)</b> | <b>PASI-100,<br/>median, %<br/>(95% CrI)</b> |
|-------------------------------|------------------------|---------------------------------------------|---------------------------------------------|---------------------------------------------|----------------------------------------------|
| Bimekizumab 320 mg            | IL-17 inhibitor        | 0.980 (0.964–0.990)                         | 0.930 (0.902–0.952)                         | 0.844 (0.801–0.880)                         | 0.587 (0.524–0.645)                          |
| Risankizumab 150 mg           | IL-23 inhibitor        | 0.967 (0.947–0.980)                         | 0.896 (0.868–0.919)                         | 0.727 (0.682–0.768)                         | 0.427 (0.377–0.477)                          |
| Ixekizumab 80 mg Q2W          | IL-17 inhibitor        | 0.965 (0.943–0.979)                         | 0.890 (0.859–0.915)                         | 0.708 (0.657–0.754)                         | 0.383 (0.331–0.437)                          |
| Guselkumab 100 mg             | IL-23 inhibitor        | 0.960 (0.934–0.977)                         | 0.878 (0.843–0.908)                         | 0.691 (0.635–0.744)                         | 0.359 (0.303–0.418)                          |
| Brodalumab 210 mg             | IL-17 inhibitor        | 0.951 (0.920–0.970)                         | 0.857 (0.817–0.891)                         | 0.695 (0.639–0.747)                         | 0.405 (0.345–0.466)                          |
| Secukinumab 300 mg            | IL-17 inhibitor        | 0.947 (0.918–0.966)                         | 0.848 (0.814–0.878)                         | 0.653 (0.604–0.700)                         | 0.338 (0.292–0.386)                          |
| Infliximab 5 mg/kg            | TNFi                   | 0.894 (0.858–0.923)                         | 0.790 (0.740–0.835)                         | 0.541 (0.477–0.605)                         | 0.248 (0.179–0.327)                          |
| Adalimumab 40 mg              | TNFi                   | 0.866 (0.819–0.903)                         | 0.717 (0.673–0.759)                         | 0.471 (0.421–0.522)                         | 0.202 (0.168–0.241)                          |
| Secukinumab 150 mg            | IL-17 inhibitor        | 0.873 (0.813–0.919)                         | 0.713 (0.649–0.772)                         | 0.442 (0.372–0.514)                         | 0.157 (0.116–0.208)                          |
| Ustekinumab 45 or 90 mg       | IL-12/23 inhibitor     | 0.873 (0.822–0.912)                         | 0.711 (0.667–0.751)                         | 0.461 (0.413–0.509)                         | 0.188 (0.157–0.224)                          |
| Ustekinumab 90 mg             | IL-12/23 inhibitor     | 0.873 (0.829–0.908)                         | 0.709 (0.645–0.766)                         | 0.432 (0.364–0.501)                         | 0.149 (0.110–0.197)                          |
| Tildrakizumab 200 mg          | IL-23 inhibitor        | 0.828 (0.755–0.885)                         | 0.642 (0.567–0.711)                         | 0.368 (0.297–0.442)                         | 0.131 (0.093–0.179)                          |
| Tildrakizumab 100 mg          | IL-23 inhibitor        | 0.820 (0.743–0.881)                         | 0.630 (0.554–0.702)                         | 0.372 (0.300–0.447)                         | 0.133 (0.094–0.183)                          |
| Deucravacitinib 6 mg          | Nonbiologic            | 0.753 (0.683–0.814)                         | 0.541 (0.465–0.616)                         | 0.294 (0.231–0.363)                         | 0.105 (0.073–0.147)                          |
| Etanercept 50 mg BIW          | TNFi                   | 0.737 (0.695–0.777)                         | 0.498 (0.459–0.538)                         | 0.227 (0.198–0.259)                         | 0.062 (0.049–0.079)                          |
| Methotrexate                  | Nonbiologic            | 0.605 (0.530–0.676)                         | 0.401 (0.330–0.475)                         | 0.176 (0.131–0.231)                         | 0.050 (0.030–0.080)                          |
| Etanercept 25 mg BIW/50 mg QW | TNFi                   | 0.669 (0.586–0.747)                         | 0.397 (0.316–0.483)                         | 0.159 (0.109–0.223)                         | 0.037 (0.019–0.067)                          |
| Apremilast 30 mg              | Nonbiologic            | 0.580 (0.525–0.635)                         | 0.335 (0.286–0.387)                         | 0.128 (0.100–0.160)                         | 0.026 (0.016–0.039)                          |
| Placebo                       | NA                     | 0.167 (0.142, 0.195)                        | 0.058 (0.044, 0.074)                        | 0.017 (0.012, 0.024)                        | 0.003 (0.002, 0.005)                         |

*BIW* twice weekly; *CrI* credible interval; *IL* interleukin; *NA* not applicable; *PASI* Psoriasis Area and Severity Index; *Q2W* every 2 weeks; *TNFi* tumor necrosis factor inhibitor

**Table S6. Main Mid-term (24–28 weeks) PASI 50, 90, and 100 response probabilities, by treatment.**

| <b>Treatment</b>              | <b>Treatment Class</b> | <b>PASI-50,<br/>median %<br/>(95% CrI)</b> | <b>PASI-75,<br/>median, %<br/>(95% CrI)</b> | <b>PASI-90,<br/>median %<br/>(95% CrI)</b> | <b>PASI-100,<br/>median %<br/>(95% CrI)</b> |
|-------------------------------|------------------------|--------------------------------------------|---------------------------------------------|--------------------------------------------|---------------------------------------------|
| Risankizumab 150 mg           | IL-23 inhibitor        | 0.979 (0.961–0.990)                        | 0.938 (0.912–0.959)                         | 0.827 (0.781–0.869)                        | 0.551 (0.488–0.618)                         |
| Bimekizumab 320 mg Q4W>Q8W    | IL-17 inhibitor        | 0.972 (0.943–0.987)                        | 0.921 (0.878–0.952)                         | 0.843 (0.782–0.892)                        | 0.625 (0.541–0.702)                         |
| Ixekizumab 80 mg Q2W>Q4W      | IL-17 inhibitor        | 0.961 (0.931–0.978)                        | 0.896 (0.858–0.925)                         | 0.792 (0.740–0.839)                        | 0.539 (0.474–0.605)                         |
| Guselkumab 100 mg             | IL-23 inhibitor        | 0.960 (0.935–0.977)                        | 0.895 (0.867–0.918)                         | 0.765 (0.726–0.801)                        | 0.456 (0.409–0.503)                         |
| Brodalumab 210 mg             | IL-17 inhibitor        | 0.944 (0.905–0.968)                        | 0.862 (0.818–0.898)                         | 0.750 (0.694–0.799)                        | 0.511 (0.448–0.574)                         |
| Secukinumab 300 mg            | IL-17 inhibitor        | 0.936 (0.901–0.960)                        | 0.847 (0.818–0.872)                         | 0.698 (0.660–0.733)                        | 0.405 (0.365–0.444)                         |
| Ustekinumab 90 mg             | IL-12/23 inhibitor     | 0.906 (0.875–0.931)                        | 0.750 (0.699–0.794)                         | 0.525 (0.466–0.582)                        | 0.272 (0.224–0.322)                         |
| Secukinumab 150 mg            | IL-17 inhibitor        | 0.877 (0.819–0.920)                        | 0.746 (0.695–0.788)                         | 0.528 (0.469–0.579)                        | 0.229 (0.186–0.272)                         |
| Ustekinumab 45 or 90 mg       | IL-12/23 inhibitor     | 0.873 (0.820–0.914)                        | 0.742 (0.704–0.776)                         | 0.579 (0.537–0.621)                        | 0.304 (0.267–0.343)                         |
| Tildrakizumab 200 mg          | IL-23 inhibitor        | 0.869 (0.808–0.915)                        | 0.734 (0.685–0.781)                         | 0.548 (0.492–0.605)                        | 0.275 (0.228–0.325)                         |
| Infliximab 5 mg/kg            | TNFi                   | 0.821 (0.763–0.868)                        | 0.723 (0.660–0.777)                         | 0.510 (0.441–0.575)                        | 0.240 (0.168–0.323)                         |
| Tildrakizumab 100 mg          | IL-23 inhibitor        | 0.861 (0.800–0.909)                        | 0.722 (0.671–0.770)                         | 0.504 (0.448–0.561)                        | 0.222 (0.181–0.270)                         |
| Adalimumab 40 mg              | TNFi                   | 0.853 (0.790–0.901)                        | 0.710 (0.659–0.755)                         | 0.531 (0.476–0.584)                        | 0.263 (0.219–0.310)                         |
| Deucravacitinib 6 mg          | Nonbiologic            | 0.788 (0.737–0.832)                        | 0.633 (0.580–0.684)                         | 0.378 (0.327–0.430)                        | 0.153 (0.121–0.190)                         |
| Etanercept 50 mg BIW          | TNFi                   | 0.727 (0.646–0.800)                        | 0.544 (0.495–0.590)                         | 0.317 (0.272–0.363)                        | 0.105 (0.080–0.134)                         |
| Methotrexate                  | Nonbiologic            | 0.693 (0.585–0.789)                        | 0.501 (0.390–0.615)                         | 0.277 (0.189–0.386)                        | 0.093 (0.047–0.164)                         |
| Etanercept 25 mg BIW/50 mg QW | TNFi                   | 0.632 (0.515–0.739)                        | 0.437 (0.350–0.530)                         | 0.246 (0.165–0.347)                        | 0.078 (0.039–0.142)                         |
| Apremilast 30 mg              | Nonbiologic            | 0.538 (0.485–0.593)                        | 0.348 (0.301–0.398)                         | 0.187 (0.150–0.228)                        | 0.056 (0.038–0.079)                         |
| Placebo                       | NA                     | 0.167 (0.142–0.195)                        | 0.064 (0.048–0.083)                         | 0.021 (0.014–0.031)                        | 0.003 (0.002–0.006)                         |

*BIW* twice weekly; *CrI* credible interval; *IL* interleukin; *NA* not applicable; *PASI* Psoriasis Area and Severity Index; *Q2W* every 2 weeks; *Q4W* every 4 weeks; *Q8W* every 8 weeks; *TNFi* tumor necrosis factor inhibitor

**Table S7. Main Long-term (44–60 weeks) PASI 50, 90, and 100 response probabilities, by treatment.**

| <b>Treatment</b>              | <b>Treatment Class</b> | <b>PASI-50,<br/>Median %<br/>(95% CrI)</b> | <b>PASI-75,<br/>Median, %<br/>(95% CrI)</b> | <b>PASI-90,<br/>Median %<br/>(95% CrI)</b> | <b>PASI-100,<br/>Median %<br/>(95% CrI)</b> |
|-------------------------------|------------------------|--------------------------------------------|---------------------------------------------|--------------------------------------------|---------------------------------------------|
| Risankizumab 150 mg           | IL-23 inhibitor        | 0.962 (0.933–0.981)                        | 0.916 (0.890–0.938)                         | 0.826 (0.789–0.860)                        | 0.599 (0.551–0.650)                         |
| Guselkumab 100 mg             | IL-23 inhibitor        | 0.941 (0.898–0.968)                        | 0.878 (0.838–0.911)                         | 0.762 (0.712–0.806)                        | 0.477 (0.417–0.534)                         |
| Bimekizumab 320 mg<br>Q4W>Q8W | IL-17 inhibitor        | 0.933 (0.868–0.969)                        | 0.864 (0.788–0.919)                         | 0.778 (0.688–0.854)                        | 0.538 (0.434–0.642)                         |
| Ixekizumab 80 mg<br>Q2W>Q4W   | IL-17 inhibitor        | 0.916 (0.861–0.952)                        | 0.839 (0.791–0.876)                         | 0.727 (0.667–0.777)                        | 0.519 (0.453–0.580)                         |
| Brodalumab 210 mg             | IL-17 inhibitor        | 0.898 (0.842–0.940)                        | 0.810 (0.775–0.847)                         | 0.744 (0.704–0.787)                        | 0.543 (0.497–0.598)                         |
| Secukinumab 300 mg            | IL-17 inhibitor        | 0.872 (0.809–0.920)                        | 0.770 (0.732–0.803)                         | 0.615 (0.572–0.656)                        | 0.366 (0.325–0.407)                         |
| Ustekinumab 45 or 90<br>mg    | IL-12/23 inhibitor     | 0.805 (0.726–0.874)                        | 0.680 (0.646–0.715)                         | 0.505 (0.468–0.544)                        | 0.293 (0.262–0.328)                         |
| Deucravacitinib 6 mg          | Nonbiologic            | 0.786 (0.718–0.845)                        | 0.659 (0.580–0.734)                         | 0.452 (0.373–0.537)                        | 0.205 (0.149–0.273)                         |
| Secukinumab 150 mg            | IL-17 inhibitor        | 0.764 (0.662–0.845)                        | 0.628 (0.553–0.696)                         | 0.475 (0.400–0.548)                        | 0.232 (0.176–0.295)                         |
| Adalimumab 40 mg              | TNFi                   | 0.759 (0.665–0.837)                        | 0.621 (0.563–0.674)                         | 0.417 (0.361–0.473)                        | 0.205 (0.163–0.249)                         |
| Infliximab 5 mg/kg            | TNFi                   | 0.667 (0.577–0.736)                        | 0.567 (0.477–0.639)                         | 0.398 (0.313–0.472)                        | 0.180 (0.110–0.266)                         |
| Etanercept 50 mg BIW          | TNFi                   | 0.688 (0.577–0.785)                        | 0.540 (0.461–0.611)                         | 0.326 (0.259–0.395)                        | 0.111 (0.075–0.154)                         |
| Apremilast 30 mg              | Nonbiologic            | 0.645 (0.515–0.763)                        | 0.484 (0.357–0.616)                         | 0.318 (0.194–0.471)                        | 0.130 (0.058–0.251)                         |
| Methotrexate                  | Nonbiologic            | 0.596 (0.479–0.711)                        | 0.450 (0.338–0.573)                         | 0.280 (0.188–0.394)                        | 0.109 (0.054–0.197)                         |
| Placebo                       | NA                     | 0.167 (0.141–0.196)                        | 0.064 (0.046–0.087)                         | 0.024 (0.015–0.035)                        | 0.004 (0.002–0.008)                         |

*BIW* twice weekly; *CrI* credible interval; *IL* interleukin; *NA* not applicable; *PASI* Psoriasis Area and Severity Index; *Q2W* every 2 weeks; *Q4W* every 4 weeks; *Q8W* every 8 weeks; *TNFi* tumor necrosis factor inhibitor

**Table S8. Number needed to treat: probability of achieving PASI 50, 75, 90, and 100 response probabilities at 10–16 weeks, by treatment.**

| <b>Treatment</b>              | <b>Treatment Class</b> | <b>PASI-50,<br/>median %<br/>(95% CI)</b> | <b>PASI-75,<br/>median, %<br/>(95% CI)</b> | <b>PASI-90,<br/>median %<br/>(95% CI)</b> | <b>PASI-100,<br/>median %<br/>(95% CI)</b> |
|-------------------------------|------------------------|-------------------------------------------|--------------------------------------------|-------------------------------------------|--------------------------------------------|
| Bimekizumab 320 mg Q4W>Q8W    | IL-17 inhibitor        | 1.23 (1.19, 1.28)                         | 1.15 (1.11, 1.19)                          | 1.21 (1.16, 1.28)                         | 1.71 (1.56, 1.92)                          |
| Risankizumab 150 mg           | IL-23 inhibitor        | 1.25 (1.21, 1.31)                         | 1.19 (1.16, 1.24)                          | 1.41 (1.33, 1.50)                         | 2.36 (2.11, 2.67)                          |
| Ixekizumab 80 mg Q2W          | IL-17 inhibitor        | 1.26 (1.21, 1.31)                         | 1.20 (1.16, 1.25)                          | 1.45 (1.36, 1.56)                         | 2.63 (2.31, 3.05)                          |
| Guselkumab 100 mg             | IL-23 inhibitor        | 1.26 (1.21, 1.32)                         | 1.22 (1.17, 1.28)                          | 1.49 (1.38, 1.62)                         | 2.82 (2.42, 3.33)                          |
| Brodalumab 210 mg             | IL-17 inhibitor        | 1.28 (1.23, 1.35)                         | 1.25 (1.20, 1.32)                          | 1.48 (1.37, 1.61)                         | 2.49 (2.17, 2.91)                          |
| Secukinumab 300 mg            | IL-17 inhibitor        | 1.29 (1.23, 1.35)                         | 1.27 (1.22, 1.33)                          | 1.58 (1.48, 1.70)                         | 3.01 (2.66, 3.44)                          |
| Infliximab 5 mg/kg            | TNFi                   | 1.38 (1.31, 1.47)                         | 1.37 (1.29, 1.47)                          | 1.91 (1.70, 2.17)                         | 4.10 (3.09, 5.65)                          |
| Secukinumab 150 mg            | IL-17 inhibitor        | 1.41 (1.32, 1.55)                         | 1.52 (1.40, 1.67)                          | 2.35 (2.03, 2.75)                         | 6.42 (4.97, 8.51)                          |
| Adalimumab 40 mg              | TNFi                   | 1.43 (1.34, 1.55)                         | 1.52 (1.42, 1.63)                          | 2.20 (1.98, 2.47)                         | 5.02 (4.21, 6.04)                          |
| Ustekinumab 45 or 90 mg       | IL-12/23 inhibitor     | 1.42 (1.33, 1.54)                         | 1.53 (1.44, 1.65)                          | 2.26 (2.04, 2.53)                         | 5.40 (4.55, 6.50)                          |
| Ustekinumab 90 mg             | IL-12/23 inhibitor     | 1.42 (1.34, 1.53)                         | 1.54 (1.41, 1.71)                          | 2.41 (2.07, 2.87)                         | 6.84 (5.19, 9.32)                          |
| Tildrakizumab 200 mg          | IL-23 inhibitor        | 1.51 (1.38, 1.72)                         | 1.71 (1.53, 1.96)                          | 2.86 (2.36, 3.56)                         | 7.78 (5.66, 11.07)                         |
| Tildrakizumab 100 mg          | IL-23 inhibitor        | 1.53 (1.39, 1.75)                         | 1.75 (1.55, 2.01)                          | 2.82 (2.33, 3.51)                         | 7.66 (5.59, 10.84)                         |
| Deucravacitinib 6 mg          | Nonbiologic            | 1.71 (1.53, 1.95)                         | 2.07 (1.79, 2.45)                          | 3.61 (2.90, 4.66)                         | 9.74 (6.97, 14.12)                         |
| Etanercept 50 mg BIW          | TNFi                   | 1.76 (1.62, 1.92)                         | 2.27 (2.08, 2.51)                          | 4.76 (4.14, 5.56)                         | 16.89 (13.28, 21.87)                       |
| Methotrexate                  | Nonbiologic            | 2.29 (1.95, 2.77)                         | 2.91 (2.40, 3.66)                          | 6.29 (4.70, 8.80)                         | 21.30 (13.10, 37.14)                       |
| Etanercept 25 mg BIW/50 mg QW | TNFi                   | 1.99 (1.72, 2.41)                         | 2.96 (2.35, 3.89)                          | 7.08 (4.90, 10.95)                        | 29.33 (15.71, 62.07)                       |
| Apremilast 30 mg              | Nonbiologic            | 2.42 (2.12, 2.83)                         | 3.60 (3.03, 4.38)                          | 9.04 (7.00, 12.17)                        | 43.69 (27.92, 75.26)                       |

*BIW* twice weekly; *CI* confidence interval; *IL* interleukin; *PASI* Psoriasis Area and Severity Index; *QW* once weekly; *Q2W* every 2 weeks; *Q4W* every 4 weeks; *Q8W* every 8 weeks; *TNFi* tumor necrosis factor inhibitor

**Table S9. Number needed to treat: probability of achieving PASI 50, 75, 90, and 100 response probabilities at 24–28 weeks, by treatment.**

| <b>Treatment</b>              | <b>Treatment Class</b> | <b>PASI-50,<br/>median %<br/>(95% CI)</b> | <b>PASI-75,<br/>median, %<br/>(95% CI)</b> | <b>PASI-90,<br/>median %<br/>(95% CI)</b> | <b>PASI-100,<br/>median %<br/>(95% CI)</b> |
|-------------------------------|------------------------|-------------------------------------------|--------------------------------------------|-------------------------------------------|--------------------------------------------|
| Risankizumab 150 mg           | IL-23 inhibitor        | 1.23 (1.19, 1.29)                         | 1.14 (1.11, 1.19)                          | 1.24 (1.18, 1.32)                         | 1.83 (1.63, 2.06)                          |
| Bimekizumab 320 mg Q4W>Q8W    | IL-17 inhibitor        | 1.24 (1.20, 1.31)                         | 1.17 (1.12, 1.24)                          | 1.22 (1.15, 1.32)                         | 1.61 (1.43, 1.86)                          |
| Ixekizumab 80 mg Q2W>Q4W      | IL-17 inhibitor        | 1.26 (1.21, 1.33)                         | 1.20 (1.15, 1.27)                          | 1.30 (1.22, 1.39)                         | 1.87 (1.66, 2.13)                          |
| Guselkumab 100 mg             | IL-23 inhibitor        | 1.26 (1.21, 1.33)                         | 1.20 (1.16, 1.26)                          | 1.34 (1.28, 1.42)                         | 2.21 (2.00, 2.47)                          |
| Brodalumab 210 mg             | IL-17 inhibitor        | 1.29 (1.23, 1.37)                         | 1.25 (1.19, 1.34)                          | 1.37 (1.28, 1.49)                         | 1.97 (1.75, 2.25)                          |
| Secukinumab 300 mg            | IL-17 inhibitor        | 1.30 (1.24, 1.38)                         | 1.28 (1.23, 1.34)                          | 1.48 (1.40, 1.57)                         | 2.49 (2.27, 2.77)                          |
| Ustekinumab 90 mg             | IL-12/23 inhibitor     | 1.35 (1.29, 1.44)                         | 1.46 (1.36, 1.59)                          | 1.99 (1.78, 2.25)                         | 3.72 (3.14, 4.53)                          |
| Secukinumab 150 mg            | IL-17 inhibitor        | 1.41 (1.31, 1.55)                         | 1.47 (1.37, 1.60)                          | 1.98 (1.79, 2.24)                         | 4.44 (3.72, 5.49)                          |
| Ustekinumab 45 or 90 mg       | IL-12/23 inhibitor     | 1.42 (1.32, 1.55)                         | 1.48 (1.39, 1.58)                          | 1.79 (1.66, 1.95)                         | 3.33 (2.94, 3.80)                          |
| Tildrakizumab 200 mg          | IL-23 inhibitor        | 1.43 (1.32, 1.58)                         | 1.49 (1.39, 1.63)                          | 1.90 (1.71, 2.13)                         | 3.69 (3.11, 4.45)                          |
| Tildrakizumab 100 mg          | IL-23 inhibitor        | 1.44 (1.34, 1.60)                         | 1.52 (1.41, 1.66)                          | 2.07 (1.85, 2.35)                         | 4.58 (3.75, 5.65)                          |
| Infliximab 5 mg/kg            | TNFi                   | 1.53 (1.41, 1.70)                         | 1.52 (1.40, 1.69)                          | 2.05 (1.80, 2.39)                         | 4.24 (3.13, 6.08)                          |
| Adalimumab 40 mg              | TNFi                   | 1.46 (1.35, 1.62)                         | 1.55 (1.44, 1.69)                          | 1.96 (1.77, 2.21)                         | 3.86 (3.26, 4.65)                          |
| Deucravacitinib 6 mg          | Nonbiologic            | 1.61 (1.48, 1.78)                         | 1.76 (1.60, 1.95)                          | 2.81 (2.44, 3.29)                         | 6.68 (5.35, 8.50)                          |
| Etanercept 50 mg BIW          | TNFi                   | 1.79 (1.57, 2.12)                         | 2.09 (1.88, 2.35)                          | 3.38 (2.92, 4.01)                         | 9.87 (7.68, 13.13)                         |
| Methotrexate                  | Nonbiologic            | 1.90 (1.60, 2.42)                         | 2.29 (1.81, 3.09)                          | 3.92 (2.74, 6.00)                         | 11.23 (6.23, 22.88)                        |
| Etanercept 25 mg BIW/50 mg QW | TNFi                   | 2.15 (1.74, 2.91)                         | 2.68 (2.14, 3.54)                          | 4.45 (3.07, 7.03)                         | 13.44 (7.23, 28.47)                        |
| Apremilast 30 mg              | Nonbiologic            | 2.70 (2.31, 3.24)                         | 3.52 (2.96, 4.29)                          | 6.06 (4.82, 7.87)                         | 19.09 (13.18, 28.88)                       |

*BIW* twice weekly; *CI* confidence interval; *IL* interleukin; *PASI* Psoriasis Area and Severity Index; *QW* once weekly; *Q2W* every 2 weeks; *Q4W* every 4 weeks; *Q8W* every 8 weeks; *TNFi* tumor necrosis factor inhibitor



**Table S10. Number needed to treat: probability of achieving PASI 50, 75, 90, and 100 response probabilities at 44–60 weeks, by treatment.**

| <b>Treatment</b>           | <b>Treatment Class</b> | <b>PASI-50,<br/>median %<br/>(95% CI)</b> | <b>PASI-75,<br/>median, %<br/>(95% CI)</b> | <b>PASI-90,<br/>median %<br/>(95% CI)</b> | <b>PASI-100,<br/>median %<br/>(95% CI)</b> |
|----------------------------|------------------------|-------------------------------------------|--------------------------------------------|-------------------------------------------|--------------------------------------------|
| Risankizumab 150 mg        | IL-23 inhibitor        | 1.26 (1.21, 1.33)                         | 1.18 (1.13, 1.22)                          | 1.25 (1.19, 1.31)                         | 1.68 (1.55, 1.83)                          |
| Guselkumab 100 mg          | IL-23 inhibitor        | 1.29 (1.23, 1.38)                         | 1.23 (1.17, 1.30)                          | 1.35 (1.28, 1.46)                         | 2.12 (1.89, 2.42)                          |
| Bimekizumab 320 mg Q4W>Q8W | IL-17 inhibitor        | 1.31 (1.23, 1.44)                         | 1.25 (1.16, 1.39)                          | 1.33 (1.20, 1.51)                         | 1.87 (1.57, 2.33)                          |
| Ixekizumab 80 mg Q2W>Q4W   | IL-17 inhibitor        | 1.34 (1.26, 1.46)                         | 1.29 (1.22, 1.39)                          | 1.42 (1.33, 1.56)                         | 1.94 (1.74, 2.23)                          |
| Brodalumab 210 mg          | IL-17 inhibitor        | 1.37 (1.28, 1.50)                         | 1.34 (1.27, 1.42)                          | 1.39 (1.31, 1.48)                         | 1.85 (1.68, 2.03)                          |
| Secukinumab 300 mg         | IL-17 inhibitor        | 1.42 (1.32, 1.57)                         | 1.42 (1.34, 1.52)                          | 1.69 (1.58, 1.83)                         | 2.76 (2.48, 3.12)                          |
| Ustekinumab 45 or 90 mg    | IL-12/23 inhibitor     | 1.57 (1.40, 1.81)                         | 1.63 (1.52, 1.75)                          | 2.08 (1.92, 2.26)                         | 3.46 (3.08, 3.89)                          |
| Deucravacitinib 6 mg       | Nonbiologic            | 1.62 (1.46, 1.83)                         | 1.68 (1.49, 1.95)                          | 2.33 (1.95, 2.87)                         | 4.99 (3.73, 6.88)                          |
| Adalimumab 40 mg           | TNFi                   | 1.68 (1.47, 2.04)                         | 1.78 (1.57, 2.07)                          | 2.22 (1.90, 2.67)                         | 4.39 (3.44, 5.83)                          |
| Secukinumab 150 mg         | IL-17 inhibitor        | 1.69 (1.48, 2.03)                         | 1.80 (1.63, 2.03)                          | 2.54 (2.22, 2.98)                         | 4.99 (4.08, 6.29)                          |
| Infliximab 5 mg/kg         | TNFi                   | 2.00 (1.74, 2.48)                         | 1.99 (1.73, 2.44)                          | 2.68 (2.23, 3.46)                         | 5.69 (3.82, 9.47)                          |
| Etanercept 50 mg BIW       | TNFi                   | 1.92 (1.61, 2.46)                         | 2.11 (1.82, 2.55)                          | 3.31 (2.69, 4.29)                         | 9.38 (6.65, 14.22)                         |
| Apremilast 30 mg           | Nonbiologic            | 2.10 (1.67, 2.90)                         | 2.38 (1.81, 3.45)                          | 3.40 (2.23, 5.90)                         | 7.95 (4.05, 18.62)                         |
| Methotrexate               | Nonbiologic            | 2.33 (1.83, 3.25)                         | 2.60 (1.96, 3.69)                          | 3.90 (2.70, 6.11)                         | 9.59 (5.18, 20.21)                         |

*BIW* twice weekly; *CI* confidence interval; *IL* interleukin; *PASI* Psoriasis Area and Severity Index; *Q2W* every 2 weeks; *Q4W* every 4 weeks; *Q8W* every 8 weeks; *TNFi* tumor necrosis factor inhibitor

**Table S11. Risk of bias summary of studies included in main analysis.**

| <b>Trial</b>                | <b>Randomization Process</b> | <b>Deviations From Intended Interventions</b> | <b>Missing Outcome Data</b> | <b>Measurement of the Outcome</b> | <b>Selection of the Reported Results</b> | <b>Overall Bias</b> |
|-----------------------------|------------------------------|-----------------------------------------------|-----------------------------|-----------------------------------|------------------------------------------|---------------------|
| ACCEPT [29]                 | Low                          | Low                                           | Low                         | Low                               | Low                                      | Low                 |
| AMAGINE 1 [32]              | Low                          | High                                          | Some concerns               | Low                               | Low                                      | High                |
| AMAGINE 2 [9]               | Low                          | Low                                           | Low                         | Low                               | Low                                      | Low                 |
| AMAGINE 3 [9]               | Low                          | Low                                           | Low                         | Low                               | Low                                      | Low                 |
| BE RADIANT [4]              | Low                          | Low                                           | Low                         | Low                               | Low                                      | Low                 |
| BE READY [35]               | Low                          | Low                                           | Low                         | Low                               | Low                                      | Low                 |
| BE SURE [24]                | Low                          | Low                                           | Low                         | Low                               | Low                                      | Low                 |
| BE VIVID [36]               | Low                          | Low                                           | Low                         | Low                               | Low                                      | Low                 |
| Blauvelt, 2021 [37]         | Some concerns                | Low                                           | Low                         | Some concerns                     | Low                                      | Some concerns       |
| BRIDGE [38]                 | Low                          | Low                                           | Low                         | Low                               | Low                                      | Low                 |
| CHAMPION [44]               | Low                          | Some concerns                                 | Low                         | Low                               | Low                                      | Some concerns       |
| CLEAR [25, 26]              | Some concerns                | Some concerns                                 | Low                         | Some concerns                     | Some concerns                            | Some concerns       |
| ECLIPSE [27]                | Low                          | Low                                           | Low                         | Low                               | Low                                      | Low                 |
| ERASURE [26]                | Low                          | Low                                           | Low                         | Low                               | Low                                      | Low                 |
| ESTEEM 1 [49]               | High                         | Low                                           | Low                         | Some concerns                     | Some concerns                            | High                |
| ESTEEM 2 [50]               | Some concerns                | Low                                           | Some concerns               | Some concerns                     | Some concerns                            | Some concerns       |
| Etanercept Study Group [51] | Low                          | Low                                           | Low                         | Low                               | Low                                      | Low                 |
| EXPRESS [52]                | Low                          | Low                                           | Low                         | Low                               | Low                                      | Low                 |
| EXPRESS II [53]             | Low                          | Low                                           | Low                         | Low                               | Low                                      | Low                 |
| FEATURE [54, 55]            | Low                          | Low                                           | Low                         | Low                               | Low                                      | Low                 |
| FIXTURE [26]                | Low                          | Low                                           | Low                         | Low                               | Low                                      | Low                 |
| IMMerge [28]                | Low                          | Some concerns                                 | Low                         | Low                               | Low                                      | Some concerns       |
| IMMhance [62]               | Low                          | Some concerns                                 | Low                         | Low                               | Low                                      | Some concerns       |
| IMMvent [5]                 | Low                          | Low                                           | Low                         | Low                               | Low                                      | Low                 |
| IXORA-S [11]                | Some concerns                | Low                                           | Low                         | Low                               | Some concerns                            | Some concerns       |
| LIBERATE [6]                | Low                          | Some concerns                                 | Low                         | Some concerns                     | Some concerns                            | Some concerns       |

|                        |               |      |      |               |               |               |
|------------------------|---------------|------|------|---------------|---------------|---------------|
| M10-114 [67]           | Some concerns | Low  | Low  | Some concerns | Some concerns | Some concerns |
| M10-315 [68]           | Some concerns | Low  | Low  | Some concerns | Low           | Some concerns |
| METOP [104]            | Low           | Low  | Low  | Low           | Low           | Low           |
| OPT Compare Study [74] | Some concerns | Low  | Low  | Some concerns | Low           | Some concerns |
| ORION [75]             | Low           | Low  | High | Some concerns | Low           | High          |
| PHOENIX 1 [79]         | Low           | Low  | Low  | Low           | Low           | Low           |
| PHOENIX 2 [80]         | Low           | Low  | Low  | Low           | Low           | Low           |
| POETYK PSO-1 [1]       | Low           | Low  | Low  | Some concerns | Low           | Some concerns |
| POETYK PSO-2 [2]       | Low           | Low  | Low  | Some concerns | Low           | Some concerns |
| Reich 2020 [83]        | Some concerns | High | High | Low           | Low           | High          |
| RESTORE 1 [84]         | Low           | High | High | Some concerns | Low           | High          |
| RESURFACE 1 [7]        | Low           | Low  | Low  | Low           | Low           | Low           |
| RESURFACE 2 [7]        | Low           | Low  | Low  | Low           | Low           | Low           |
| REVEAL [85]            | Low           | Low  | Low  | Some concerns | Some concerns | Low           |
| SPIRIT [88]            | Some concerns | Low  | High | Low           | Low           | High          |
| UltIMMa-1 [3]          | Low           | Low  | Low  | Low           | Low           | Low           |
| UltIMMa-2 [3]          | Low           | Low  | Low  | Low           | Low           | Low           |
| UNCOVER 1 [92]         | Low           | Low  | Low  | Some concerns | Low           | Some concerns |
| UNCOVER 2 [93]         | Low           | Low  | Low  | Some concerns | Low           | Some concerns |
| UNCOVER 3 [93]         | Low           | Low  | Low  | Some concerns | Low           | Some concerns |
| VOYAGE 1 [100]         | Low           | Low  | Low  | Some concerns | Some concerns | Some concerns |
| VOYAGE 2 [101]         | Low           | Low  | Low  | Some concerns | Some concerns | Some concerns |
